# Supplementary material for: Molecular Details of Actinomycin D-Treated MRSA Revealed via High-Dimensional Data
Source: MDPI journal article supplement (doi:10.3390/md20020114), 2022-01-31
Supplement: s1 [file s1]

**Table S5.** Proteome-metabolome data co-analysis.

| ID      | Name                                     | #Cpd    | Cpd<br>Metabolites                                                                                                                                                         | Proteins (accession)                                                                 |
|---------|------------------------------------------|---------|----------------------------------------------------------------------------------------------------------------------------------------------------------------------------|--------------------------------------------------------------------------------------|
| ko00230 | Purine metabolism                        | 18      | Adenine D-Ribose 5-phosphate Adenosine monophosphate (AMP) Xanthylic acid (XMP) Inosine Xanthosine Guanosine 5'-monophosphate (GMP) Hypoxanthine ADP-ribose Deoxyadenosine | Q99WJ1 Q6GEU7 Q6GHM6 Q6GJC6 Q6GEE4 Q6GGU2 Q99UU0 Q6GA63                              |
| ko00630 | Glyoxylate and dicarboxylate metabolism  | 17      | Succinate L-Serine L-Glutamate cis-Aconitate D-Ribulose 1,5-bisphosphate DL-2-Phosphoglycerate Citrate Glyceric acid                                                       | Q6GII3 Q6GHY9 Q6G9K9 Q99RW4 Q2Y<br>YT1 Q8NWD0 Q8NWC9 Q6GH72 Q8NY<br>95               |
| ko00260 | Glycine, serine and threonine metabolism | 15      | L-Serine L-Threonine DL-2-Phosphoglycerate Glyceric acid Betaine Choline                                                                                                   | Q6GII3 Q6GHY9 Q6GJB8 Q8NXY3 Q6G6<br>Q5 Q8NWD0 Q8NWC9 Q8NUM0 Q99SJ<br>1               |
| ko05230 | Central carbon metabolism in cancer      | 14      | Succinate L-Serine L-Glutamate DL-2-Phosphoglycerate Citrate L-Methionine L-Leucine L-Valine L-Histidine L-Arginine L-Isoleucine                                           | Q6GG08 Q820A6 Q6G6Q5                                                                 |
| ko00020 | Citrate cycle (TCA cycle)                | 13      | Succinate cis-Aconitate Citrate                                                                                                                                            | Q6GHY9 Q6G9K9 Q6GHJ0 Q8NX01 Q8N<br>W61 Q931R8 Q5HES4 Q8NWR7 Q820A6<br> Q2YY06        |
| ko00720 | Carbon fixation pathways in prokaryotes  | 13      | Succinate cis-Aconitate Citrate 5-Methyltetrahydrofolate (5-Methyl-THF)                                                                                                    | Q6G9K9 Q8NX95 Q6GHJ0 Q8NX01 Q8N<br>W61 Q5HES4 Q2G296 Q5HF42 Q8NY95                   |
| ko00240 | Pyrimidine metabolism                    | 13      | Uridine diphosphate glucose(UDP-D-Glucose) Uracil Uridine 5'-diphosphate (UDP) Uridine Uridine 5'-monophosphate (UMP)                                                      | Q6GEU7 Q6GJC6 Q6GA10 Q8NX25 Q99S<br>C3 Q6GGU2 Q8NYD0 Q6GHN4                          |
| ko00970 | Aminoacyl-tRNA biosynthesis              | 13      | L-Serine L-Glutamate L-Threonine L-Methionine L-Leucine L-Valine L-Histidine L-Arginine L-Isoleucine                                                                       | Q6GFF6 Q5HJY7 Q99W73 P41368                                                          |
| ko00620 | Pyruvate metabolism                      | 12      | Succinate                                                                                                                                                                  | Q6GHY9 Q6GK73 Q8NXY2 Q5HJK3 Q6<br>GDS2 Q5HES4 Q820A6 Q99WZ7 Q8NU<br>M9 Q8NY95 Q2FWX9 |
| ko00010 | Glycolysis<br>Gluconeogenesis            | /<br>12 | DL-2-Phosphoglycerate                                                                                                                                                      | Q6GG08 Q93P61 Q6GHY9 Q6GK73 Q5H<br>JK3 Q5HCU6 Q820A6 Q6G6Q5 Q8NUM9<br> Q6GG19 Q2FWX9 |

|         |                                             |    |                                                                                                     |                                                         |
|---------|---------------------------------------------|----|-----------------------------------------------------------------------------------------------------|---------------------------------------------------------|
| ko02020 | Two-component system                        | 11 | Succinate L-Glutamate Citrate                                                                       | Q6GD89 Q7A4R9 Q931H9 Q6GIF4 Q99VW2 Q6GIF6 Q8NY95 Q99X00 |
| ko00340 | Histidine metabolism                        | 11 | L-Carnosine L-Glutamate L-Histidine                                                                 | Q5HJK3 Q8NV65 Q6GEA1 Q6GDC8 Q8NUI2 P64356 Q931G1 Q2FWX9 |
| ko00330 | Arginine and proline metabolism             | 11 | D-Proline L-Glutamate Hydroxyproline L-Arginine Creatinine S-Adenosylmethionine                     | Q5HF24 Q5HJK3 Q6GAW9 Q8NUR2 Q2FWX9                      |
| ko00310 | Lysine degradation                          | 10 | Succinate 2-Oxoadipic acid L-Saccharopine                                                           | Q5HF24 Q5HJK3 Q931R8 Q8NWR7 Q8NY95 Q2FWX9 Q2YY06        |
| ko00270 | Cysteine and methionine metabolism          | 10 | L-Serine L-Methionine S-Methyl-5'-thioadenosine S-Adenosylmethionine                                | Q6GEU1 Q6GK73 Q6GBT3 Q8NUM9 Q8NY94 Q99TQ0               |
| ko00220 | Arginine biosynthesis                       | 10 | L-Glutamate N2-Acetyl-L-ornithine L-Arginine L-Citrulline                                           | Q6GEE4 Q99VD0 Q99UU0 Q8NUK7 Q8NUK8 Q8NXF2               |
| ko00680 | Methane metabolism                          | 10 | L-Serine DL-2-Phosphoglycerate Glyceric acid Tyramine                                               | Q6GG08 Q99RW4 Q5HCU6 Q6G6Q5 Q2YYT1                      |
| ko00640 | Propanoate metabolism                       | 9  | Succinate Propionic acid                                                                            | Q6GHY9 Q6GK73 Q6GHJ0 Q8NX01 Q99WZ7 Q8NUM9 Q8NY95        |
| ko00250 | Alanine, aspartate and glutamate metabolism | 9  | Succinate L-Glutamate Citrate                                                                       | Q6GA10 Q8NVE6 Q99VD0 Q99TF4 Q8NUR2 Q8NXF2               |
| ko00561 | Glycerolipid metabolism                     | 9  | Uridine diphosphate glucose(UDP-D-Glucose) DL-2-Phosphoglycerate Glyceric acid Glycerol 3-phosphate | Q6GH52 Q6GHD5 Q5HJK3 Q8NUI5 Q2FWX9                      |
| ko00290 | Valine, leucine and isoleucine biosynthesis | 9  | L-Threonine L-Leucine L-Valine L-Isoleucine                                                         | Q6GF14 Q6GBT3 Q6G7Q4 Q8NVI9 Q99SJ1                      |
| ko00190 | Oxidative phosphorylation                   | 8  | Succinate Nicotinamide adenine dinucleotide (NAD)                                                   | Q6GFD7 Q99V36 Q99SF4 Q6GEX3 Q99SE9 Q99V38               |
| ko00520 | Amino sugar and nucleotide sugar metabolism | 8  | Uridine diphosphate glucose(UDP-D-Glucose) L-Fucose-1-phosphate N-Acetylmannosamine                 | Q6GIQ3 Q93P61 Q8NVE6 Q6GBR8 Q99X30                      |
| ko00280 | Valine, leucine and isoleucine degradation  | 8  | L-Leucine L-Valine L-Isoleucine                                                                     | Q6GHY9 Q6GBT3 Q5HJK3 Q8NY95 Q2FWX9                      |

|         |                                             |   |                                                                                          |                                    |
|---------|---------------------------------------------|---|------------------------------------------------------------------------------------------|------------------------------------|
| ko00380 | Tryptophan metabolism                       | 7 | 2-Oxoadipic acid Anthranilic acid (Vitamin L1)                                           | Q5HJK3 Q931R8 Q6GH72 Q8NY95 Q2FWX9 |
| ko00770 | Pantothenate and CoA biosynthesis           | 7 | Pantothenate Uracil L-Valine                                                             | Q6GHW1 Q6G8N8 Q6GBT3 Q6G7Q4        |
| ko04922 | Glucagon signaling pathway                  | 7 | Succinate DL-2-Phosphoglycerate Citrate                                                  | Q6GK73 Q820A6 Q6G6Q5 Q8NUM9        |
| ko00660 | C5-Branched dibasic acid metabolism         | 6 | L-Glutamate cis-Aconitate                                                                | Q6GF14 Q6GHJ0 Q8NX01 Q8NVI9        |
| ko00860 | Porphyrin and chlorophyll metabolism        | 6 | L-Glutamate L-Threonine                                                                  | Q6GFM3 Q8NW75 Q2YU22 Q99X56        |
| ko00030 | Pentose phosphate pathway                   | 6 | D-Ribose 5-phosphate DL-2-Phosphoglycerate Glyceric acid                                 | Q6GG08 P99174 Q5HCU6               |
| ko00410 | beta-Alanine metabolism                     | 6 | L-Carnosine Pantothenate Uracil L-Histidine                                              | Q5HJK3 Q2FWX9                      |
| ko00061 | Fatty acid biosynthesis                     | 6 | Palmitic acid Myristic acid Stearic acid cis-9-Palmitoleic acid                          | Q6GI75 Q6GIA4                      |
| ko00760 | Nicotinate and nicotinamide metabolism      | 6 | Succinate Propionic acid Nicotinate Nicotinamide Nicotinamide adenine dinucleotide (NAD) | Q5HEK9                             |
| ko00550 | Peptidoglycan biosynthesis                  | 5 | D-Alanyl-D-alanine (D-Ala-D-Ala)                                                         | Q6GIQ3 Q2FZP6 Q6GFW8 Q9KIN5        |
| ko04212 | Longevity regulating pathway - worm         | 5 | Nicotinamide Nicotinamide adenine dinucleotide (NAD)                                     | Q6GIM3 Q6GKH2 Q6GH72               |
| ko00300 | Lysine biosynthesis                         | 5 | 2-Oxoadipic acid L-Saccharopine                                                          | Q7A522 Q9EZ10 Q9EZ12               |
| ko00650 | Butanoate metabolism                        | 5 | Succinate L-Glutamate                                                                    | Q99WZ7 Q6GKH9 Q8NY95               |
| ko00480 | Glutathione metabolism                      | 5 | L-Glutamate gamma-L-Glutamyl-L-valine L-Pyroglutamic acid                                | Q8NW61 Q6GHD0                      |
| ko00966 | Glucosinolate biosynthesis                  | 5 | L-Methionine L-Leucine L-Valine L-Isoleucine                                             | Q6GF14                             |
| ko00261 | Monobactam biosynthesis                     | 5 | L-Serine L-Threonine L-Arginine S-Adenosylmethionine                                     | Q9EZ12                             |
| ko00040 | Pentose and glucuronate interconversions    | 4 | Uridine diphosphate glucose(UDP-D-Glucose)                                               | Q99WW8 Q6GK63 Q2G1B9               |
| ko00670 | One carbon pool by folate                   | 4 | 5-Methyltetrahydrofolate (5-Methyl-THF)                                                  | Q8NX95 Q2G296 Q5HF42               |
| ko00473 | D-Alanine metabolism                        | 4 | D-Alanyl-D-alanine (D-Ala-D-Ala)                                                         | Q5HF24 Q6GIF4 Q6GIF6               |
| ko00071 | Fatty acid degradation                      | 4 | Palmitic acid                                                                            | Q5HJK3 Q8NY95 Q2FWX9               |
| ko00710 | Carbon fixation in photosynthetic organisms | 4 | D-Ribose 5-phosphate D-Ribulose 1,5-bisphosphate                                         | Q5HCU6 Q6GG19                      |

|         |                                                     |   |                                                               |         |               |
|---------|-----------------------------------------------------|---|---------------------------------------------------------------|---------|---------------|
| ko04211 | Longevity regulating pathway                        | 4 | Adenosine monophosphate (AMP) Nicotinamide dinucleotide (NAD) | adenine | Q6GKH2 Q6GH72 |
| ko04068 | FoxO signaling pathway                              | 4 | L-Glutamate Adenosine monophosphate (AMP)                     |         | Q6GKH2 Q6GH72 |
| ko00564 | Glycerophospholipid metabolism                      | 4 | Glycerol 3-phosphate Triethanolamine Choline                  |         | Q6GH52        |
| ko00430 | Taurine and hypotaurine metabolism                  | 3 | L-Glutamate                                                   |         | Q99VD0 Q99TF4 |
| ko00053 | Ascorbate and aldarate metabolism                   | 3 | Uridine diphosphate glucose(UDP-D-Glucose)                    |         | Q5HJK3 Q2FWX9 |
| ko00910 | Nitrogen metabolism                                 | 3 | L-Glutamate                                                   |         | Q99VD0 Q99UU0 |
| ko00051 | Fructose and mannose metabolism                     | 3 | L-Fucose-1-phosphate                                          |         | Q6GG08 Q5HCU6 |
| ko05014 | Amyotrophic lateral sclerosis (ALS)                 | 3 | L-Glutamate L-Arginine                                        |         | Q6GH72        |
| ko04152 | AMPK signaling pathway                              | 3 | Adenosine monophosphate (AMP) Nicotinamide dinucleotide (NAD) | adenine | Q6GG08        |
| ko00500 | Starch and sucrose metabolism                       | 2 | Uridine diphosphate glucose(UDP-D-Glucose)                    |         | Q93P61        |
| ko00052 | Galactose metabolism                                | 2 | Uridine diphosphate glucose(UDP-D-Glucose)                    |         | Q6GG08        |
| ko00400 | Phenylalanine, tyrosine and tryptophan biosynthesis | 2 | Anthranilic acid (Vitamin L1)                                 |         | Q59803        |
| ko04918 | Thyroid hormone synthesis                           | 2 | D-Ribose 5-phosphate                                          |         | Q6GHD0        |
| ko00471 | D-Glutamine and D-glutamate metabolism              | 2 | L-Glutamate                                                   |         | Q6GFW8        |
| ko00983 | Drug metabolism - other enzymes                     | 2 | Nicotinamide adenine dinucleotide (NAD)                       |         | Q6GGU2        |
| ko00472 | D-Arginine and D-ornithine metabolism               | 2 | L-Arginine                                                    |         | Q5HF24        |
| ko00750 | Vitamin B6 metabolism                               | 2 | Pyridoxine                                                    |         | Q6GJF0        |

|         |                          |          |   |                                  |        |
|---------|--------------------------|----------|---|----------------------------------|--------|
| ko00590 | Arachidonic metabolism   | acid     | 2 | Arachidonic Acid (peroxide free) | Q6GHD0 |
| ko00900 | Terpenoid biosynthesis   | backbone | 2 | Mevalonic acid                   | Q8NY95 |
| ko05016 | Huntington disease       |          | 2 | L-Glutamate                      | Q6GKH2 |
| ko00360 | Phenylalanine metabolism |          | 2 | Succinate                        | Q5HF24 |

---
