# Supplementary material for: Molecular Details of Actinomycin D-Treated MRSA Revealed via High-Dimensional Data
Source: MDPI journal article supplement (doi:10.3390/md20020114), 2022-01-31
Supplement: s1 [file s1]

**Table S1.** Protein quantification and analysis of significant differences.

| Accession | Protein Name                                            | Coverage | Unique Peptides | Peptides | MW [kDa] | Average-MRSA-T | Average-MRSA-CK | log <sub>2</sub> (fold changes) <sup>1</sup> | Type <sup>1</sup> | t-test p value |
|-----------|---------------------------------------------------------|----------|-----------------|----------|----------|----------------|-----------------|----------------------------------------------|-------------------|----------------|
| Q99WJ1    | Xanthine phosphoribosyltransferase                      | 22.4     | 4               | 4        | 20.884   | 1340200000     | 102379666.7     | 13.09049                                     | up                | 0.000692173    |
| Q99VR1    | 7-cyano-7-deazaguanine synthase                         | 4.1      | 1               | 1        | 24.887   | 207720000      | 19115650        | 10.866489                                    | up                | 0.013270795    |
| Q8NWQ6    | Extracellular matrix-binding protein ebh                | 0.6      | 3               | 4        | 1068.5   | 134356666.7    | 12692333.33     | 10.585655                                    | up                | 1.22982E-05    |
| Q99TM4    | UPF0337 protein SAV1625                                 | 35       | 2               | 3        | 6.6824   | 3054966667     | 365206666.7     | 8.365035                                     | up                | 0.000162936    |
| Q6GEU1    | S-ribosylhomocysteine lyase                             | 20.5     | 2               | 2        | 17.514   | 163023333.3    | 22159400        | 7.356848                                     | up                | 0.000557339    |
| Q6GI88    | Regulatory protein Spx                                  | 56.5     | 8               | 8        | 15.44    | 350090000      | 48890333.33     | 7.16072                                      | up                | 0.000891295    |
| Q99W81    | Transcriptional regulator CtsR                          | 16.3     | 2               | 2        | 17.841   | 390900000      | 57399666.67     | 6.810144                                     | up                | 4.69433E-05    |
| Q99UI1    | tRNA-2-methylthio-N(6)-dimethylallyl-adenosine synthase | 8.2      | 5               | 5        | 58.916   | 85341333.33    | 14811233.33     | 5.761933                                     | up                | 0.017568731    |
| Q6GH57    | Large-conductance mechanosensitive channel              | 5.8      | 1               | 1        | 13.616   | 41324666.67    | 7254533.333     | 5.696392                                     | up                | 0.00195524     |
| Q99WC3    | Recombination protein RecR                              | 36.9     | 5               | 5        | 22.072   | 45676000       | 9087233.333     | 5.026392                                     | up                | 0.000885844    |
| Q6GIQ3    | UDP-N-acetylenolpyruvylglucosamine reductase            | 11.1     | 4               | 4        | 33.753   | 151370000      | 34045666.67     | 4.446087                                     | up                | 2.34085E-06    |
| Q6GG27    | 50S ribosomal protein L20                               | 35.6     | 6               | 6        | 13.686   | 1270500000     | 306046666.7     | 4.151328                                     | up                | 5.35511E-05    |
| Q6GH63    | UPF0154 protein SAR1353                                 | 51.2     | 6               | 6        | 9.3195   | 2106233333     | 507390000       | 4.151113                                     | up                | 0.020682308    |
| Q6GEU7    | Probable DNA-directed RNA polymerase subunit delta      | 55.7     | 8               | 8        | 20.881   | 618106666.7    | 156616666.7     | 3.946621                                     | up                | 0.000167285    |
| Q99U67    | Probable CtpA-like serine protease                      | 2.4      | 1               | 1        | 55.25    | 47591000       | 12317333.33     | 3.863742                                     | up                | 3.70036E-06    |
| Q6GHW1    | Phosphopantetheine adenylyltransferase                  | 6.2      | 1               | 1        | 18.371   | 57948666.67    | 15700000        | 3.690998                                     | up                | 9.68537E-06    |
| Q5HJU7    | Putative surface protein SACOL0050                      | 2.1      | 2               | 2        | 164.85   | 134264666.7    | 37175666.67     | 3.611628                                     | up                | 0.030348067    |
| Q6GJD1    | 50S ribosomal protein L11                               | 62.1     | 9               | 9        | 14.874   | 6109366667     | 1709266667      | 3.574262                                     | up                | 0.003355313    |
| Q9ZHA2    | Cell division protein SepF                              | 29.9     | 5               | 5        | 21.023   | 193503333.3    | 55040666.67     | 3.515643                                     | up                | 0.001181347    |
| Q99U87    | Uncharacterized hydrolase SAV1398                       | 10.4     | 3               | 3        | 43.143   | 16129000       | 4660600         | 3.460713                                     | up                | 0.002032692    |
| Q8NW72    | ATP-dependent Clp protease ATP-binding subunit ClpX     | 37.9     | 14              | 14       | 46.296   | 2116100000     | 612113333.3     | 3.45704                                      | up                | 4.56644E-06    |
| Q6GEV5    | 50S ribosomal protein L31 type B                        | 54.8     | 4               | 4        | 9.7228   | 3253900000     | 954626666.7     | 3.408558                                     | up                | 0.002409563    |

|        |                                                                     |      |    |    |        |             |             |          |    |             |
|--------|---------------------------------------------------------------------|------|----|----|--------|-------------|-------------|----------|----|-------------|
| Q6GKT0 | 50S ribosomal protein L9                                            | 46.6 | 6  | 6  | 16.454 | 538246666.7 | 159893333.3 | 3.366286 | up | 0.004449218 |
| Q99S23 | 50S ribosomal protein L23                                           | 54.9 | 6  | 6  | 10.605 | 967290000   | 296873333.3 | 3.258258 | up | 0.000727952 |
| Q6GIM3 | ATP-dependent Clp protease proteolytic subunit                      | 60.5 | 8  | 8  | 21.513 | 4523133333  | 1393666667  | 3.245492 | up | 2.71026E-05 |
| Q6GJJ4 | Nucleoid-associated protein SAR0478                                 | 59   | 5  | 5  | 11.597 | 7416200000  | 2293766667  | 3.233197 | up | 0.000359587 |
| Q6GHM6 | Guanylate kinase                                                    | 25.1 | 4  | 4  | 24.023 | 37709000    | 11833333.33 | 3.186676 | up | 0.002465052 |
| Q2FZP6 | UDP-N-acetylmuramoyl-L-alanyl-D-glutamate--L-lysine ligase          | 5.9  | 2  | 2  | 54.104 | 77678666.67 | 24557000    | 3.163199 | up | 2.66622E-05 |
| Q99Q02 | Regulatory protein MsrR                                             | 8.9  | 4  | 4  | 36.97  | 172170000   | 54505666.67 | 3.158754 | up | 0.001970875 |
| Q6GH51 | DNA topoisomerase 4 subunit B                                       | 11.3 | 8  | 8  | 74.397 | 539513333.3 | 173553333.3 | 3.108631 | up | 0.0007757   |
| Q6GHI4 | Methylenetetrahydrofolate--tRNA-(uracil-5-)-methyltransferase TrmFO | 14.7 | 5  | 5  | 48.359 | 93654000    | 30340000    | 3.086816 | up | 0.000121195 |
| Q6GI75 | Enoyl-[acyl-carrier-protein] reductase [NADPH] FabI                 | 14.5 | 4  | 4  | 27.992 | 834736666.7 | 271920000   | 3.069788 | up | 0.000407647 |
| Q6GGD7 | DNA primase                                                         | 10.9 | 7  | 7  | 69.275 | 168163333.3 | 56380666.67 | 2.982642 | up | 2.71324E-05 |
| Q99U78 | Uncharacterized protein SAV1409                                     | 8.4  | 2  | 2  | 29.448 | 68261000    | 22979666.67 | 2.970496 | up | 0.002701604 |
| Q6GGC5 | 30S ribosomal protein S21                                           | 48.3 | 5  | 5  | 6.9721 | 6817700000  | 2298633333  | 2.96598  | up | 0.001190012 |
| Q8NVT1 | ATP-dependent DNA helicase PcrA                                     | 19.6 | 13 | 13 | 84.073 | 323196666.7 | 109382666.7 | 2.954734 | up | 0.000914291 |
| Q6YP15 | Peptidyl-tRNA hydrolase                                             | 5.3  | 1  | 1  | 21.703 | 9316100     | 3202200     | 2.909281 | up | 6.73541E-05 |
| Q99S31 | 50S ribosomal protein L14                                           | 59.8 | 9  | 9  | 13.135 | 4683100000  | 1644600000  | 2.847562 | up | 0.000650701 |
| Q6GFD7 | Probable manganese-dependent inorganic pyrophosphatase              | 44.7 | 11 | 11 | 34.068 | 630333333.3 | 222173333.3 | 2.837124 | up | 0.022946612 |
| Q6GFF6 | Aspartyl/glutamyl-tRNA(Asn/Gln) amidotransferase subunit C          | 85   | 6  | 6  | 11.267 | 1658733333  | 588330000   | 2.819393 | up | 3.10898E-05 |
| Q6GH52 | Glycerol-3-phosphate acyltransferase                                | 6.9  | 1  | 1  | 22.232 | 15624000    | 5572433.333 | 2.803802 | up | 0.001187114 |
| Q99UM1 | DNA topoisomerase 1                                                 | 15.5 | 10 | 10 | 79.07  | 96731333.33 | 34739666.67 | 2.784463 | up | 0.0002295   |
| Q99SH6 | DEAD-box ATP-dependent RNA helicase CshA                            | 23.9 | 11 | 11 | 56.942 | 589653333.3 | 213440000   | 2.762619 | up | 0.000596421 |
| Q6G8P5 | Translation initiation factor IF-3                                  | 24.6 | 4  | 4  | 20.213 | 1320866667  | 486253333.3 | 2.716417 | up | 7.62608E-05 |
| Q6GIG3 | Lipoyl synthase                                                     | 37.7 | 11 | 11 | 34.885 | 1220233333  | 451746666.7 | 2.701145 | up | 7.85131E-06 |

|        |                                                        |      |    |    |        |             |             |          |    |             |
|--------|--------------------------------------------------------|------|----|----|--------|-------------|-------------|----------|----|-------------|
| Q99VB5 | Chaperone protein ClpB                                 | 31.9 | 23 | 25 | 98.329 | 1322900000  | 500403333.3 | 2.643667 | up | 0.000386096 |
| Q6GH50 | DNA topoisomerase 4 subunit A                          | 8.9  | 6  | 6  | 91.077 | 264900000   | 100826333.3 | 2.62729  | up | 0.011554133 |
| Q6GCA6 | Single-stranded DNA-binding protein 2                  | 38.9 | 6  | 6  | 18.539 | 2010200000  | 774730000   | 2.59471  | up | 0.000249078 |
| Q6GJV1 | 30S ribosomal protein S18                              | 56.2 | 5  | 5  | 9.3098 | 513116666.7 | 198840000   | 2.580551 | up | 0.000905252 |
| P66083 | 50S ribosomal protein L19                              | 54.3 | 1  | 9  | 13.376 | 11094733.33 | 4327633.333 | 2.563695 | up | 0.009428881 |
| Q6GBU9 | 50S ribosomal protein L1                               | 63.5 | 12 | 12 | 24.708 | 2728333333  | 1068100000  | 2.55438  | up | 0.000162713 |
| Q99S28 | 50S ribosomal protein L16                              | 34.7 | 5  | 5  | 16.242 | 3032266667  | 1196683333  | 2.533892 | up | 0.036318853 |
| Q6GKU1 | DNA replication and repair protein RecF                | 3.8  | 1  | 1  | 42.415 | 2294800     | 911486.6667 | 2.517645 | up | 0.002768185 |
| Q99S51 | 50S ribosomal protein L13                              | 81.4 | 13 | 13 | 16.333 | 4178633333  | 1698466667  | 2.460239 | up | 0.000120011 |
| Q6G9B3 | Holliday junction resolvase RecU                       | 14.4 | 3  | 3  | 24.443 | 28424333.33 | 11576000    | 2.455454 | up | 0.00814617  |
| Q99VT5 | HTH-type transcriptional regulator MgrA                | 56.5 | 8  | 8  | 17.089 | 881373333.3 | 360593333.3 | 2.444231 | up | 1.26916E-05 |
| Q6GEJ1 | 50S ribosomal protein L29                              | 50.7 | 4  | 4  | 8.0902 | 3643000000  | 1500700000  | 2.427534 | up | 0.000107996 |
| Q931Q3 | 50S ribosomal protein L27                              | 34   | 3  | 3  | 10.315 | 2636633333  | 1090666667  | 2.417451 | up | 0.000384784 |
| Q99S26 | 50S ribosomal protein L22                              | 65.8 | 8  | 8  | 12.835 | 3413666667  | 1419933333  | 2.404103 | up | 0.00063021  |
| Q99TK6 | 50S ribosomal protein L21                              | 66.7 | 7  | 7  | 11.333 | 2268400000  | 946550000   | 2.396493 | up | 0.000749004 |
| Q6GJD2 | Transcription termination/antitermination protein NusG | 54.9 | 10 | 10 | 20.663 | 1802500000  | 757096666.7 | 2.380806 | up | 0.000250339 |
| Q99WT9 | ESAT-6 secretion machinery protein EssC                | 1.8  | 3  | 3  | 170.93 | 238406666.7 | 100319333.3 | 2.376478 | up | 0.009531204 |
| Q6GF42 | 10 kDa chaperonin                                      | 45.7 | 5  | 5  | 10.416 | 2714366667  | 1158066667  | 2.343878 | up | 0.001457008 |
| Q99S46 | 50S ribosomal protein L17                              | 45.9 | 6  | 6  | 13.748 | 374046666.7 | 165186666.7 | 2.264388 | up | 0.000212003 |
| Q6GD89 | Chromosomal replication initiator protein DnaA         | 32.7 | 15 | 15 | 51.965 | 487370000   | 217466666.7 | 2.241125 | up | 0.000852467 |
| Q6GF14 | 3-isopropylmalate dehydratase large subunit            | 6.2  | 3  | 3  | 50.254 | 297073333.3 | 133176333.3 | 2.230677 | up | 0.03584097  |
| Q8NX05 | 50S ribosomal protein L19                              | 54.3 | 1  | 9  | 13.362 | 2413233333  | 1085300000  | 2.223563 | up | 0.000435787 |
| Q6GJC3 | 30S ribosomal protein S12                              | 47.4 | 8  | 8  | 15.287 | 6456433333  | 2915933333  | 2.214191 | up | 0.006142404 |
| Q6GHF0 | Protein RecA                                           | 41.2 | 12 | 12 | 37.656 | 856346666.7 | 388203333.3 | 2.205923 | up | 0.000241235 |
| Q8NY74 | Uncharacterized protein MW0361                         | 55   | 15 | 15 | 35.612 | 986386666.7 | 447400000   | 2.204709 | up | 0.002578834 |
| Q59803 | Chorismate synthase                                    | 5.9  | 2  | 2  | 43.059 | 51373666.67 | 23688333.33 | 2.168733 | up | 0.025739491 |
| Q6GJC6 | DNA-directed RNA polymerase subunit beta               | 59.3 | 58 | 58 | 133.2  | 7325100000  | 3386366667  | 2.163115 | up | 8.67609E-06 |
| Q8NWA9 | Protein GrpE                                           | 57.2 | 2  | 9  | 24.008 | 303950000   | 140790000   | 2.158889 | up | 0.017360473 |

|        |                                                               |      |    |    |        |                 |                |          |      |             |
|--------|---------------------------------------------------------------|------|----|----|--------|-----------------|----------------|----------|------|-------------|
| Q99VD4 | Putative peptidyl-prolyl cis-trans isomerase                  | 53.3 | 7  | 7  | 21.619 | 417673333.3     | 196390000      | 2.126755 | up   | 0.001919681 |
| Q6GIA4 | 3-oxoacyl-[acyl-carrier-protein] synthase 3                   | 9.9  | 2  | 2  | 33.879 | 80925666.67     | 38084000       | 2.124926 | up   | 0.01355387  |
| Q931G5 | 30S ribosomal protein S10                                     | 57.8 | 5  | 5  | 11.579 | 1411733333      | 668866666.7    | 2.110635 | up   | 0.000929709 |
| Q8NWZ0 | tRNA pseudouridine synthase B                                 | 17   | 5  | 5  | 34.534 | 380643333.3     | 181180000      | 2.100913 | up   | 0.004450787 |
| Q6GEI3 | 50S ribosomal protein L3                                      | 36.8 | 6  | 6  | 23.718 | 1900100000      | 905006666.7    | 2.099543 | up   | 0.003493191 |
| Q8NWF2 | Segregation and condensation protein B                        | 3.9  | 1  | 1  | 20.205 | 11662666.67     | 5607333.333    | 2.079895 | up   | 0.003523539 |
| Q6GEK1 | 50S ribosomal protein L30                                     | 83.1 | 7  | 7  | 6.5536 | 4377000000      | 2113000000     | 2.071462 | up   | 0.002808692 |
| Q6GHL1 | 50S ribosomal protein L28                                     | 35.5 | 3  | 3  | 6.9771 | 770153333.3     | 372060000      | 2.069971 | up   | 0.0071421   |
| Q6GG08 | ATP-dependent 6-phosphofructokinase                           | 33.5 | 9  | 9  | 34.823 | 382856666.7     | 186113333.3    | 2.057116 | up   | 4.81066E-05 |
| Q6GJV3 | 30S ribosomal protein S6                                      | 67.3 | 9  | 9  | 11.595 | 1467400000      | 715943333.3    | 2.049604 | up   | 0.001238955 |
| Q6GBU7 | 50S ribosomal protein L7/L12                                  | 90.2 | 1  | 11 | 12.711 | 1380200000<br>0 | 6757200000     | 2.042562 | up   | 0.0008945   |
| P19529 | Replication initiation protein                                | 6.4  | 1  | 2  | 38.163 | 12222666.67     | 5991066.667    | 2.040149 | up   | 0.000881638 |
| Q99WA2 | 50S ribosomal protein L25                                     | 34.6 | 6  | 6  | 23.787 | 2290933333      | 1124633333     | 2.037049 | up   | 0.001163532 |
| Q99VW2 | Response regulator protein GraR                               | 5.8  | 1  | 1  | 26.066 | 3067700         | - <sup>2</sup> | -        | up   | -           |
| Q6GG87 | Putative pre-16S rRNA nuclease                                | 12.7 | 2  | 2  | 15.865 | 2888333         | -              | -        | up   | -           |
| Q8NXZ2 | Dihydropteroate synthase                                      | 6.4  | 1  | 1  | 29.522 | 4144800         | -              | -        | up   | -           |
| Q6GH72 | Catalase                                                      | 69.9 | 1  | 26 | 58.377 | 2248747         | -              | -        | up   | -           |
| Q9KIN5 | Undecaprenyl-diphosphatase                                    | 4.1  | 1  | 1  | 32.312 | 7786767         | -              | -        | up   | -           |
| P41368 | Isoleucine--tRNA ligase                                       | 1.8  | 2  | 2  | 118.87 | 10601867        | -              | -        | up   | -           |
| Q6GI15 | Phosphoribosylformylglycinamidine synthase subunit PurL       | 1.5  | 1  | 1  | 79.501 | 9301167         | -              | -        | up   | -           |
| Q99UQ0 | Probable dual-specificity RNA methyltransferase RlmN          | 4.4  | 1  | 1  | 41.904 | 12973333        | -              | -        | up   | -           |
| P39857 | Capsular polysaccharide biosynthesis glycosyltransferase CapH | 3.7  | 1  | 1  | 41.41  | 19175333        | -              | -        | up   | -           |
| Q6GII3 | Glycine cleavage system H protein                             | 46   | 4  | 4  | 14.08  | 609890000       | 1223233333     | 0.498588 | down | 0.008959431 |
| Q93P61 | PTS system glucose-specific EIIA component                    | 29.5 | 4  | 4  | 17.96  | 482346666.7     | 968390000      | 0.498091 | down | 0.000516869 |
| Q6GHD5 | Glycerol kinase                                               | 38.2 | 17 | 17 | 55.667 | 515090000       | 1040606667     | 0.49499  | down | 0.000209123 |
| Q6GFM3 | Uroporphyrinogen decarboxylase                                | 22   | 6  | 6  | 39.294 | 48985333.33     | 99244333.33    | 0.493583 | down | 0.007019228 |

|        |                                                        |      |    |    |        |             |             |          |      |             |
|--------|--------------------------------------------------------|------|----|----|--------|-------------|-------------|----------|------|-------------|
| Q8NXH0 | Probable cysteine desulfurase                          | 21.1 | 6  | 6  | 46.276 | 74806333.33 | 152416666.7 | 0.490802 | down | 8.64147E-05 |
| Q6GHY9 | Dihydrolipoyl dehydrogenase                            | 60.7 | 25 | 25 | 49.451 | 2201266667  | 4497800000  | 0.48941  | down | 0.000313118 |
| Q6GA10 | Carbamoyl-phosphate synthase large chain               | 11.3 | 12 | 12 | 117.18 | 65547666.67 | 142293333.3 | 0.460652 | down | 0.005546586 |
| Q6GK73 | L-lactate dehydrogenase 1                              | 14.5 | 4  | 4  | 34.565 | 1005836667  | 2275133333  | 0.4421   | down | 0.002580152 |
| Q6GEE4 | Urease subunit alpha                                   | 11   | 5  | 5  | 61.775 | 238766666.7 | 541036666.7 | 0.441313 | down | 0.000353555 |
| Q8NX25 | Orotate phosphoribosyltransferase                      | 3.9  | 1  | 1  | 22.015 | 10978966.67 | 25867333.33 | 0.424434 | down | 0.008033638 |
| P99174 | Deoxyribose-phosphate aldolase 2                       | 53.2 | 2  | 9  | 23.341 | 375716666.7 | 906343333.3 | 0.414541 | down | 0.003647871 |
| Q99T33 | UPF0342 protein SAV1845                                | 73.7 | 8  | 8  | 13.31  | 1982633333  | 4816266667  | 0.411654 | down | 0.028622851 |
| Q7A4R9 | Response regulator protein VraR                        | 39.2 | 7  | 7  | 23.559 | 53669333.33 | 132790000   | 0.404167 | down | 0.00051981  |
| Q8NW95 | 5-oxoprolinase subunit A                               | 4.4  | 2  | 2  | 27.421 | 54117000    | 135839666.7 | 0.398389 | down | 0.033983073 |
| Q99QV3 | Lactonase drp35                                        | 6.2  | 2  | 2  | 35.963 | 4507500     | 11545033.33 | 0.390428 | down | 0.002463711 |
| Q6GJR7 | Alkyl hydroperoxide reductase C                        | 68.8 | 11 | 11 | 20.976 | 1915500000  | 4929133333  | 0.388608 | down | 0.003382539 |
| Q6GJF0 | Pyridoxal 5-phosphate synthase subunit PdxS            | 66.8 | 15 | 15 | 31.992 | 1097566667  | 2842233333  | 0.386163 | down | 0.000371641 |
| Q6GJB8 | Q8NVE6                                                 | 63.5 | 1  | 21 | 42.847 | 174406666.7 | 459713333.3 | 0.379381 | down | 0.000752799 |
| Q99SC3 | Pyrimidine-nucleoside phosphorylase                    | 61.2 | 20 | 20 | 46.366 | 335300000   | 884893333.3 | 0.378916 | down | 0.00079422  |
| Q8NXY3 | Putative pyridoxal phosphate-dependent acyltransferase | 68.9 | 2  | 22 | 42.891 | 1388733333  | 3759700000  | 0.369373 | down | 0.00017854  |
| Q99V36 | Probable quinol oxidase subunit 2                      | 48.9 | 15 | 15 | 41.777 | 596743333.3 | 1619700000  | 0.368428 | down | 0.004505389 |
| Q6GHQ6 | Ribosomal RNA small subunit methyltransferase H        | 18.6 | 4  | 4  | 35.681 | 14910666.67 | 41673666.67 | 0.357796 | down | 0.000973029 |
| Q99TF3 | Putative universal stress protein SAV1710              | 79.5 | 10 | 10 | 18.475 | 874793333.3 | 2452433333  | 0.356704 | down | 0.001322045 |
| Q99WW8 | Ribitol-5-phosphate cytidyltransferase 1               | 68.5 | 9  | 12 | 26.656 | 59463666.67 | 167440000   | 0.355134 | down | 0.009930546 |
| Q6G8N8 | Dephospho-CoA kinase                                   | 39.6 | 6  | 6  | 23.623 | 5764650     | 16576666.67 | 0.347757 | down | 0.021774976 |
| Q7A522 | Putative dipeptidase SA1572                            | 52   | 16 | 16 | 52.824 | 118096666.7 | 350860000   | 0.336592 | down | 0.000256149 |
| Q6GGU2 | Nucleoside diphosphate kinase                          | 29.5 | 4  | 4  | 16.575 | 88633333.33 | 266553333.3 | 0.332516 | down | 0.002896198 |
| Q99VH8 | Organic hydroperoxide resistance protein-like          | 25.7 | 3  | 3  | 15.339 | 237943333.3 | 722143333.3 | 0.329496 | down | 0.001488111 |
| Q931H9 | Accessory gene regulator A                             | 14.7 | 4  | 4  | 27.921 | 42709333.33 | 130060000   | 0.328382 | down | 0.00031095  |
| Q99SF4 | ATP synthase gamma chain                               | 20.1 | 4  | 4  | 32.106 | 29757333.33 | 90687000    | 0.328132 | down | 0.002002733 |

|        |                                                                  |      |    |    |        |             |             |          |      |             |
|--------|------------------------------------------------------------------|------|----|----|--------|-------------|-------------|----------|------|-------------|
| Q5HF24 | D-alanine aminotransferase                                       | 55.7 | 11 | 11 | 31.893 | 115673333.3 | 370823333.3 | 0.311937 | down | 0.02343008  |
| Q8NVI5 | Serine-protein kinase RsbW                                       | 54.1 | 8  | 8  | 17.92  | 42354666.67 | 139533333.3 | 0.303545 | down | 0.000701602 |
| Q6G9K9 | Aconitate hydratase A                                            | 42.6 | 28 | 28 | 98.968 | 958636666.7 | 3200800000  | 0.299499 | down | 1.65729E-05 |
| Q8NW75 | Glutamate-1-semialdehyde 2,1-aminomutase 1                       | 18   | 6  | 6  | 46.388 | 214710000   | 739343333.3 | 0.290406 | down | 0.003836199 |
| Q99U34 | 3-5 exonuclease DinG                                             | 2.2  | 2  | 2  | 104.22 | 4062000     | 14339666.67 | 0.28327  | down | 0.0020004   |
| Q8NX95 | Bifunctional protein FOLD                                        | 60.5 | 3  | 14 | 30.843 | 115310000   | 407193333.3 | 0.283182 | down | 3.0411E-05  |
| Q6G859 | Uncharacterized protein SAS1797                                  | 52.6 | 6  | 6  | 18.632 | 637730000   | 2323500000  | 0.27447  | down | 0.016716348 |
| Q8NVA1 | Molybdopterin molybdenumtransferase                              | 18.4 | 7  | 7  | 44.989 | 12627666.67 | 46073000    | 0.27408  | down | 0.000279477 |
| Q6GBT3 | Probable branched-chain-amino-acid aminotransferase              | 38.3 | 2  | 9  | 40.086 | 66480000    | 244293333.3 | 0.272132 | down | 2.4178E-05  |
| Q6GHJ0 | Succinate--CoA ligase [ADP-forming] subunit beta                 | 59   | 21 | 21 | 42.086 | 1883600000  | 7039166667  | 0.267588 | down | 0.000271538 |
| Q6GFW8 | UDP-N-acetylmuramate--L-alanine ligase                           | 10.3 | 5  | 5  | 49.202 | 46171666.67 | 177263333.3 | 0.260469 | down | 0.000137265 |
| Q2YU22 | Glutamate-1-semialdehyde 2,1-aminomutase 2                       | 20.3 | 1  | 7  | 46.775 | 10855133.33 | 42861333.33 | 0.253262 | down | 0.003579885 |
| Q99VG5 | UPF0337 protein SAV0840                                          | 75   | 8  | 9  | 7.0186 | 3083233333  | 12241600000 | 0.251865 | down | 0.011261972 |
| Q8NVE6 | Glutamine--fructose-6-phosphate aminotransferase [isomerizing]   | 40.9 | 16 | 16 | 65.849 | 2134033333  | 8685833333  | 0.245691 | down | 0.000109984 |
| Q8NXY2 | Protein/nucleic acid deglycase HchA                              | 24.7 | 7  | 7  | 32.18  | 78827333.33 | 328170000   | 0.240203 | down | 0.001489452 |
| Q8NWM8 | 30S ribosomal protein S1                                         | 73.7 | 2  | 25 | 43.287 | 607776666.7 | 2553566667  | 0.238011 | down | 0.000259657 |
| Q8NV80 | Putative 2-hydroxyacid dehydrogenase MW2224                      | 66.2 | 15 | 15 | 34.674 | 147750000   | 633370000   | 0.233276 | down | 6.22603E-06 |
| Q6GIF4 | D-alanyl carrier protein                                         | 43.6 | 3  | 3  | 9.0631 | 38517800    | 170920000   | 0.225356 | down | 0.008970923 |
| Q5HJK3 | Putative aldehyde dehydrogenase AldA                             | 59.2 | 22 | 22 | 53.658 | 120856666.7 | 542116666.7 | 0.222935 | down | 0.0006867   |
| Q9EZ10 | 2,3,4,5-tetrahydropyridine-2,6-dicarboxylate N-acetyltransferase | 16.7 | 4  | 4  | 25.258 | 39250333.33 | 178496666.7 | 0.219894 | down | 0.000411146 |
| Q99RW4 | Putative formate dehydrogenase SA2102                            | 23.2 | 3  | 19 | 111.29 | 137293333.3 | 634403333.3 | 0.216413 | down | 0.003267046 |
| Q6GDS2 | D-lactate dehydrogenase                                          | 32.4 | 10 | 10 | 36.755 | 36728666.67 | 178446666.7 | 0.205824 | down | 0.012478183 |

|            |                                                                                                   |      |    |    |        |             |             |          |      |             |
|------------|---------------------------------------------------------------------------------------------------|------|----|----|--------|-------------|-------------|----------|------|-------------|
| Q6GEP7     | Alkaline shock protein 23                                                                         | 74.6 | 11 | 11 | 19.191 | 731810000   | 3708300000  | 0.197344 | down | 0.001616808 |
| Q5HCU6     | Fructose-bisphosphate aldolase class 1                                                            | 82.8 | 24 | 24 | 33.054 | 616066666.7 | 3197066667  | 0.192697 | down | 0.000429403 |
| Q7A7E0     | N-acetylmuramoyl-L-alanine amidase sle1                                                           | 38.9 | 3  | 8  | 35.835 | 99301333.33 | 533573333.3 | 0.186106 | down | 0.001083896 |
| Q8NX01     | Succinate--CoA ligase [ADP-forming] subunit alpha                                                 | 65.9 | 14 | 14 | 31.526 | 481310000   | 2699766667  | 0.178278 | down | 0.00239102  |
| Q99W56     | Uncharacterized epimerase/dehydratase SAV0553                                                     | 26.5 | 1  | 6  | 36.052 | 7095350     | 40214333.33 | 0.176438 | down | 0.031229892 |
| Q8NW61     | Isocitrate dehydrogenase [NADP]                                                                   | 39.3 | 14 | 14 | 46.436 | 315260000   | 1884500000  | 0.167291 | down | 0.00025468  |
| Q931R8     | 2-oxoglutarate dehydrogenase E1 component                                                         | 18.9 | 13 | 13 | 105.36 | 23972000    | 145896666.7 | 0.164308 | down | 0.001266425 |
| Q5HJY7     | Serine--tRNA ligase                                                                               | 62.4 | 25 | 25 | 48.639 | 256790000   | 1570700000  | 0.163488 | down | 0.00523062  |
| Q5HES4     | Fumarate hydratase class II                                                                       | 31.5 | 12 | 12 | 51.107 | 138683333.3 | 874646666.7 | 0.158559 | down | 0.000169899 |
| A0A0H3JVA1 | Poly(ribitol-phosphate) beta-N-acetylglucosaminyltransferase TarS                                 | 13.8 | 6  | 6  | 66.254 | 9078366.667 | 59462666.67 | 0.152673 | down | 1.76107E-05 |
| Q99VM3     | Ribosome hibernation promotion factor                                                             | 38.4 | 7  | 7  | 22.213 | 75111000    | 510226666.7 | 0.147211 | down | 2.62844E-05 |
| O86488     | Serine-aspartate repeat-containing protein D                                                      | 24.9 | 23 | 24 | 142.77 | 31921666.67 | 233536666.7 | 0.136688 | down | 0.000997388 |
| Q8NYD0     | Pseudouridine-5-phosphate glycosidase                                                             | 39.4 | 10 | 10 | 32.809 | 13303000    | 97596000    | 0.136307 | down | 0.000949765 |
| Q5HEK9     | NH(3)-dependent NAD(+) synthetase                                                                 | 62.6 | 11 | 11 | 30.696 | 41588333.33 | 314410000   | 0.132274 | down | 0.001526923 |
| Q99WU4     | ESAT-6 secretion system extracellular protein A                                                   | 71.1 | 7  | 7  | 11.036 | 22037200    | 167870000   | 0.131275 | down | 0.014430419 |
| Q99W73     | Cysteine--tRNA ligase                                                                             | 27.7 | 11 | 11 | 53.684 | 10643766.67 | 81112666.67 | 0.131222 | down | 0.038558628 |
| Q5HH71     | Putative phosphoesterase SACOL1020                                                                | 49.7 | 1  | 8  | 19.326 | 37506333.33 | 286050000   | 0.131118 | down | 0.022697414 |
| Q8NWR7     | Dihydrolipoyllysine-residue succinyltransferase component of 2-oxoglutarate dehydrogenase complex | 40.8 | 3  | 14 | 46.673 | 141373333.3 | 1156633333  | 0.122228 | down | 5.63921E-05 |
| Q99VD0     | NAD-specific glutamate dehydrogenase                                                              | 53.4 | 17 | 17 | 45.76  | 95673333.33 | 798636666.7 | 0.119796 | down | 5.06289E-07 |
| Q820A6     | Pyruvate dehydrogenase E1 component subunit alpha                                                 | 40   | 12 | 12 | 41.382 | 296253333.3 | 2557500000  | 0.115837 | down | 0.013166555 |
| Q6G6Q5     | 2,3-bisphosphoglycerate-dependent phosphoglycerate mutase                                         | 67.1 | 13 | 13 | 26.68  | 67996666.67 | 601353333.3 | 0.113073 | down | 0.002190588 |
| Q99UU0     | Carbamate kinase 1                                                                                | 33.5 | 9  | 9  | 33.596 | 10396000    | 94843000    | 0.109613 | down | 3.84191E-05 |

|                |                                                            |      |    |    |        |             |                 |          |      |             |
|----------------|------------------------------------------------------------|------|----|----|--------|-------------|-----------------|----------|------|-------------|
| Q99TF4         | Alanine dehydrogenase 2                                    | 28   | 8  | 8  | 40.079 | 34651333.33 | 316136666.7     | 0.109609 | down | 2.09723E-06 |
| Q2YYT1         | Putative formate dehydrogenase SAB2186c                    | 22   | 2  | 18 | 111.31 | 12466500    | 115343333.3     | 0.108082 | down | 0.000303244 |
| Q99S93         | UPF0457 protein SA1975.1                                   | 75.6 | 7  | 7  | 10.006 | 470420000   | 4366966667      | 0.107722 | down | 6.32792E-06 |
| Q6GAW9         | Ornithine aminotransferase 2                               | 46.2 | 16 | 16 | 43.417 | 117966666.7 | 1234033333      | 0.095594 | down | 0.00015795  |
| Q5HF67         | Uncharacterized peptidase SACOL1756                        | 22.2 | 5  | 5  | 39.553 | 23740000    | 314003333.3     | 0.075604 | down | 6.47064E-06 |
| Q2G296         | Formate--tetrahydrofolate ligase                           | 47   | 1  | 20 | 59.856 | 146720000   | 1963533333      | 0.074722 | down | 0.000152706 |
| Q6GHU0         | Thioredoxin                                                | 81.7 | 7  | 7  | 11.44  | 821826666.7 | 1360933333<br>3 | 0.060387 | down | 0.000896326 |
| Q8NWD0         | Probable glycine dehydrogenase (decarboxylating) subunit 2 | 35.7 | 13 | 13 | 54.781 | 24691000    | 427220000       | 0.057795 | down | 3.06741E-06 |
| Q8NY72         | UPF0355 protein MW0363                                     | 84.4 | 8  | 8  | 15.122 | 18158150    | 325173333.3     | 0.055841 | down | 0.034937621 |
| Q8NUR2         | 1-pyrroline-5-carboxylate dehydrogenase                    | 60.9 | 26 | 26 | 56.868 | 173283333.3 | 3366133333      | 0.051478 | down | 0.000171541 |
| Q99VC0         | Coenzyme A disulfide reductase                             | 42.9 | 13 | 13 | 49.29  | 5198966.667 | 124230000       | 0.04185  | down | 4.48897E-05 |
| Q99WZ7         | Formate acetyltransferase                                  | 64.5 | 40 | 40 | 84.861 | 98426333.33 | 3240200000      | 0.030377 | down | 0.007892112 |
| Q8NUM9         | L-lactate dehydrogenase 2                                  | 55.5 | 12 | 12 | 34.42  | 73664566.67 | 2953733333      | 0.024939 | down | 0.006656171 |
| Q8NUK7         | Arginine deiminase                                         | 85.4 | 33 | 33 | 46.914 | 54613666.67 | 2663700000      | 0.020503 | down | 0.001428148 |
| Q8NUK8         | Ornithine carbamoyltransferase, catabolic                  | 82.4 | 18 | 19 | 37.762 | 52790350    | 3135700000      | 0.016835 | down | 0.001590626 |
| Q8NWC9         | Probable glycine dehydrogenase (decarboxylating) subunit 1 | 22.5 | 9  | 9  | 49.716 | 2487433.333 | 157120000       | 0.015831 | down | 6.70456E-09 |
| Q6GG19         | Glyceraldehyde-3-phosphate dehydrogenase 2                 | 30.2 | 9  | 9  | 37.003 | 18748766.67 | 1938166667      | 0.009673 | down | 6.17739E-06 |
| A0A0H3<br>K686 | Immunoglobulin G-binding protein A                         | 58.1 | 26 | 26 | 55.554 | 36428333.33 | 4161733333      | 0.008753 | down | 0.000532659 |
| Q8NX96         | Bifunctional autolysin                                     | 72.8 | 0  | 75 | 137.41 | 63677333.33 | 1611900000<br>0 | 0.00395  | down | 0.010927187 |
| Q6GKH2         | Superoxide dismutase [Mn/Fe] 2                             | 53.8 | 8  | 9  | 23.041 | 586176.6667 | 162063333.3     | 0.003617 | down | 0.00022189  |
| A0A0H3J<br>T43 | Glycine cleavage system H-like protein                     | 31.8 | 2  | 2  | 12.422 | -           | 17110000        | -        | down | -           |
| Q99X11         | FMN-dependentNADH-azoreductase                             | 20.7 | 3  | 3  | 23.352 | -           | 30989667        | -        | down | -           |



|        |                                                                      |      |    |    |        |   |           |   |      |   |
|--------|----------------------------------------------------------------------|------|----|----|--------|---|-----------|---|------|---|
| Q8NY94 | 5-methyltetrahydropteroyltriglutamate--homocysteinemethyltransferase | 5.8  | 3  | 4  | 85.074 | - | 3959833   | - | down | - |
| Q6GBR8 | Glucosamine-6-phosphatedeaminase                                     | 17.9 | 3  | 3  | 28.467 | - | 11643033  | - | down | - |
| Q6GIF6 | D-alanine--D-alanylcarrierproteinligase                              | 19   | 7  | 7  | 54.585 | - | 49043000  | - | down | - |
| Q8NXF2 | Argininosuccinatesynthase                                            | 44.1 | 1  | 14 | 44.441 | - | 8292700   | - | down | - |
| Q99UX4 | Iron-regulatedsurface determinant protein A                          | 3.4  | 1  | 1  | 38.745 | - | 17828333  | - | down | - |
| Q8NWZ3 | RibosomematurationfactorRimP                                         | 9.7  | 1  | 1  | 17.627 | - | 3924233   | - | down | - |
| Q6GH71 | 50SribosomalproteinL332                                              | 26.5 | 1  | 1  | 5.9318 | - | 15073500  | - | down | - |
| Q9EZ12 | 4-hydroxy-tetrahydrodipicolinatesynthase                             | 8.5  | 2  | 2  | 32.584 | - | 20387500  | - | down | - |
| Q99U66 | UPF0346proteinSAV1421                                                | 17.8 | 1  | 1  | 8.8697 | - | 4777450   | - | down | - |
| Q6G943 | Exodeoxyribonuclease7smallsubunit                                    | 77.6 | 4  | 4  | 8.7596 | - | 86649000  | - | down | - |
| Q6G8Y8 | ChaperoneproteinDnaJ                                                 | 19   | 6  | 6  | 41.76  | - | 54601667  | - | down | - |
| Q99TQ0 | 5-methylthioadenosine/S-adenosylhomocysteinenucleosidase             | 5.7  | 1  | 1  | 24.534 | - | 3750133   | - | down | - |
| Q6GG71 | D-aminoacyl-tRNAdeacylase                                            | 22.7 | 3  | 3  | 16.725 | - | 10114200  | - | down | - |
| Q8NW56 | UPF0173metal-dependent hydrolaseMW1650                               | 17.5 | 2  | 2  | 25.25  | - | 6674933   | - | down | - |
| Q8NVU3 | RegulatoryproteinRecX                                                | 5.1  | 1  | 1  | 32.241 | - | 3153167   | - | down | - |
| Q6GFE5 | UPF0316proteinSAR2004                                                | 9    | 1  | 1  | 22.955 | - | 1829700   | - | down | - |
| Q6G7Q4 | Dihydroxy-aciddehydratase                                            | 7.1  | 3  | 3  | 60.021 | - | 6244000   | - | down | - |
| Q8NVI9 | 3-isopropylmalatedehydratasesmallsubunit                             | 10.5 | 2  | 2  | 21.605 | - | 7459067   | - | down | - |
| Q6GEX3 | ATPsynthaseepsilonchain                                              | 11.9 | 1  | 1  | 14.844 | - | 81636333  | - | down | - |
| Q99SE9 | ATPsynthasesubunita                                                  | 2.9  | 1  | 1  | 27.63  | - | 1740700   | - | down | - |
| Q99SE4 | UPF0340proteinSAV2114                                                | 10.3 | 2  | 2  | 18.895 | - | 2342550   | - | down | - |
| Q6GEJ4 | 50SribosomalproteinL24                                               | 16.2 | 2  | 2  | 11.536 | - | 25914333  | - | down | - |
| Q8NV65 | Imidazolonepropionase                                                | 7    | 3  | 3  | 45.052 | - | 24735333  | - | down | - |
| Q6GEA1 | Formimidoylglutamase                                                 | 3.9  | 1  | 1  | 34.436 | - | 7294467   | - | down | - |
| Q99RL2 | Immunoglobulin-bindingproteinSbi                                     | 28.7 | 11 | 11 | 50.042 | - | 366556667 | - | down | - |

|        |                                                                                                   |      |   |    |        |   |           |   |      |   |
|--------|---------------------------------------------------------------------------------------------------|------|---|----|--------|---|-----------|---|------|---|
| Q8NUM0 | Oxygen-dependent choline dehydrogenase                                                            | 14.6 | 8 | 8  | 63.623 | - | 24697667  | - | down | - |
| Q99R06 | HTH-type transcriptional regulator ArcR                                                           | 32.1 | 6 | 6  | 27.428 | - | 34348000  | - | down | - |
| Q6GDC8 | Imidazole glycerol-phosphate dehydratase                                                          | 18.8 | 3 | 3  | 21.46  | - | 16760333  | - | down | - |
| Q99X56 | Heme oxygenase (staphylobilin-producing) 2                                                        | 52.8 | 5 | 5  | 12.791 | - | 112355000 | - | down | - |
| Q5HJB7 | Iron-sulfur cluster repair protein ScdA                                                           | 35.7 | 2 | 5  | 25.485 | - | 54188667  | - | down | - |
| Q5HGX8 | UPF0637 protein SACOL1115                                                                         | 34.3 | 5 | 5  | 24.019 | - | 59989667  | - | down | - |
| Q8NX50 | Fibrinogen-binding protein                                                                        | 10.9 | 2 | 2  | 18.764 | - | 16346667  | - | down | - |
| Q5HFU2 | Elastin-binding protein EbpS                                                                      | 24.7 | 7 | 7  | 53.221 | - | 64858000  | - | down | - |
| Q5HF42 | Formate--tetrahydrofolate ligase                                                                  | 46.8 | 1 | 20 | 59.913 | - | 6481767   | - | down | - |
| Q6G6A5 | Probable transglycosylase IsaA                                                                    | 36.1 | 4 | 4  | 24.203 | - | 71485333  | - | down | - |
| Q8NUI2 | 1-(5-phosphoribosyl)-5-[(5-phosphoribosylamino)methylideneamino]imidazole-4-carboxamide isomerase | 11.1 | 2 | 2  | 26.09  | - | 5461567   | - | down | - |
| Q6GAW1 | Signal peptidase IB                                                                               | 20.4 | 4 | 4  | 21.692 | - | 9372350   | - | down | - |
| Q6GH44 | Peptide methionine sulfoxide reductase MsrA1                                                      | 6.5  | 1 | 1  | 19.611 | - | 3500250   | - | down | - |
| Q6G9D7 | Peptide methionine sulfoxide reductase MsrA2                                                      | 29.4 | 4 | 4  | 20.588 | - | 43445333  | - | down | - |
| Q99SN8 | Uncharacterized leukocidin-like protein 1                                                         | 7.1  | 2 | 2  | 38.662 | - | 6082533   | - | down | - |
| Q6GA63 | dITP/XTP pyrophosphatase                                                                          | 7.2  | 1 | 1  | 21.403 | - | 3508400   | - | down | - |
| Q931E9 | Putative surface protein SAV2496/SAV2497                                                          | 7    | 3 | 3  | 122.21 | - | 37391000  | - | down | - |
| Q6GHD0 | Glutathione peroxidase homolog BsaA                                                               | 12.7 | 2 | 2  | 18.117 | - | 46808500  | - | down | - |
| P64356 | Histidine biosynthesis bifunctional protein HisIE                                                 | 5.2  | 1 | 1  | 23.944 | - | 117180000 | - | down | - |
| Q6GK63 | Ribitol-5-phosphate cytidyl transferase 2                                                         | 26.9 | 4 | 7  | 26.533 | - | 33656667  | - | down | - |
| Q8NUI5 | Lipase 1                                                                                          | 1    | 1 | 1  | 76.675 | - | 27763333  | - | down | - |
| Q6GHN4 | Dihydroorotase                                                                                    | 7.1  | 2 | 2  | 46.385 | - | 15155667  | - | down | - |
| Q6GKH9 | Diacetyl reductase [(S)-acetoin forming]                                                          | 32.6 | 5 | 5  | 27.215 | - | 33564000  | - | down | - |
| Q931G1 | Urocanate hydratase                                                                               | 18.6 | 9 | 9  | 60.663 | - | 233460000 | - | down | - |

|        |                                                                                             |      |   |    |        |   |           |   |      |   |
|--------|---------------------------------------------------------------------------------------------|------|---|----|--------|---|-----------|---|------|---|
| Q9LAB5 | ImmunodominantstaphylococcalantigenB                                                        | 25.1 | 4 | 4  | 19.37  | - | 139615000 | - | down | - |
| Q99RB2 | PutativeNAD(P)HnitroreductaseSAV2523                                                        | 9.4  | 2 | 2  | 25.374 | - | 7989067   | - | down | - |
| Q5HD73 | UncharacterizedoxidoreductaseSACOL2488                                                      | 44.2 | 7 | 7  | 24.604 | - | 64692333  | - | down | - |
| Q99RQ9 | UncharacterizedlipoproteinSAV2368                                                           | 15.7 | 2 | 2  | 22.837 | - | 33198000  | - | down | - |
| Q99RT8 | LysostaphinresistanceproteinA                                                               | 4.5  | 1 | 1  | 46.785 | - | 20438333  | - | down | - |
| Q9F0R1 | HTH-typetranscriptionalregulatorSarR                                                        | 46.1 | 5 | 5  | 13.669 | - | 107142333 | - | down | - |
| Q99SJ1 | L-threoninedehydratasebiosyntheticIlvA                                                      | 3.8  | 2 | 2  | 46.97  | - | 13732667  | - | down | - |
| Q5HEH9 | Uncharacterizedleukocidin-likeprotein2                                                      | 19.1 | 6 | 6  | 40.434 | - | 93543667  | - | down | - |
| Q7A4W3 | SignaltransductionproteinTRAP                                                               | 32.3 | 5 | 5  | 19.547 | - | 111703333 | - | down | - |
| Q99V38 | Probablequinoloxidasesubunit3                                                               | 5    | 1 | 1  | 23.057 | - | 29637333  | - | down | - |
| Q99W49 | FMN-dependentNADPH-azoreductase                                                             | 28.7 | 4 | 4  | 20.911 | - | 15948333  | - | down | - |
| Q8NY95 | Probableacetyl-CoAacyltransferase                                                           | 20.1 | 4 | 4  | 41.717 | - | 33157333  | - | down | - |
| Q99X00 | UncharacterizedresponseregulatoryproteinSAV0223                                             | 12.7 | 2 | 2  | 29.575 | - | 4020650   | - | down | - |
| Q99X30 | N-acetylmuramicacid6-phosphateetherase                                                      | 3.7  | 1 | 1  | 32.382 | - | 8518067   | - | down | - |
| Q2FWX9 | 4,4-diaponeurosporen-aldehydedehydrogenase                                                  | 9.8  | 3 | 3  | 51.741 | - | 6788450   | - | down | - |
| Q2G015 | ClumpingfactorA                                                                             | 1.3  | 1 | 1  | 96.446 | - | 30428333  | - | down | - |
| Q2G1B9 | Ribulose-5-phosphatereductase1                                                              | 13.8 | 3 | 3  | 38.451 | - | 12879667  | - | down | - |
| Q2G222 | N-acetylmuramoyl-L-alanineamidasedomain-containingproteinSAOUHSC_02979                      | 8.2  | 4 | 4  | 69.252 | - | 7827033   | - | down | - |
| Q99UT4 | UncharacterizedN-acetyltransferaseSA1019                                                    | 23.3 | 3 | 3  | 17.002 | - | 19546333  | - | down | - |
| Q2YY06 | Dihydrolipoyllysine-residuesuccinyltransferasecomponentof2-oxoglutaratedehydrogenasecomplex | 33.9 | 0 | 12 | 46.705 | - | 56901000  | - | down | - |
| Q5HH31 | Bifunctionalautolysin                                                                       | 71.7 | 0 | 74 | 137.33 | - | 325340000 | - | down | - |

|                |                                    |      |   |   |        |   |          |   |      |   |
|----------------|------------------------------------|------|---|---|--------|---|----------|---|------|---|
| A0A0H3J<br>T43 | GlycinecleavagesystemH-likeprotein | 31.8 | 2 | 2 | 12.422 | - | 17110000 | - | down | - |
| Q99X11         | FMN-dependentNADH-azoreductase     | 20.7 | 3 | 3 | 23.352 | - | 30989667 | - | down | - |

<sup>1</sup>up and down represent up-regulation and down-regulation respectively. <sup>2</sup> The symbol "-" indicates that there is no value.
