# Supplementary material for: Molecular Details of Actinomycin D-Treated MRSA Revealed via High-Dimensional Data
Source: MDPI journal article supplement (doi:10.3390/md20020114), 2022-01-31
Supplement: s1 [file s1]

**Table S3.** KEGG pathways in which differentially expressed proteins are involved.

| Map_ID  | Map Name                                         | Test | TestAll | Ref | RefAll | P value  | FDR      | RichFactor  |
|---------|--------------------------------------------------|------|---------|-----|--------|----------|----------|-------------|
| ko05150 | Staphylococcus aureus infection                  | 12   | 261     | 14  | 623    | 0.000892 | 0.098122 | 0.857142857 |
| ko00660 | C5-Branched dibasic acid metabolism              | 4    | 261     | 4   | 623    | 0.030393 | 0.650899 | 1           |
| ko00310 | Lysine degradation                               | 7    | 261     | 9   | 623    | 0.031913 | 0.650899 | 0.777777778 |
| ko00720 | Carbon fixation pathways in prokaryotes          | 9    | 261     | 13  | 623    | 0.042154 | 0.650899 | 0.692307692 |
| ko00630 | Glyoxylate and dicarboxylate metabolism          | 9    | 261     | 13  | 623    | 0.042154 | 0.650899 | 0.692307692 |
| ko00260 | Glycine, serine and threonine metabolism         | 9    | 261     | 13  | 623    | 0.042154 | 0.650899 | 0.692307692 |
| ko00280 | Valine, leucine and isoleucine degradation       | 5    | 261     | 6   | 623    | 0.049576 | 0.650899 | 0.833333333 |
| ko00270 | Cysteine and methionine metabolism               | 6    | 261     | 8   | 623    | 0.061371 | 0.650899 | 0.75        |
| ko00340 | Histidine metabolism                             | 8    | 261     | 12  | 623    | 0.072956 | 0.650899 | 0.666666667 |
| ko00650 | Butanoate metabolism                             | 3    | 261     | 3   | 623    | 0.073037 | 0.650899 | 1           |
| ko01503 | Cationic antimicrobial peptide (CAMP) resistance | 3    | 261     | 3   | 623    | 0.073037 | 0.650899 | 1           |
| ko00020 | Citrate cycle (TCA cycle)                        | 10   | 261     | 16  | 623    | 0.076465 | 0.650899 | 0.625       |
| ko03010 | Ribosome                                         | 29   | 261     | 56  | 623    | 0.076924 | 0.650899 | 0.517857143 |
| ko00290 | Valine, leucine and isoleucine biosynthesis      | 5    | 261     | 7   | 623    | 0.114447 | 0.839277 | 0.714285714 |
| ko00380 | Tryptophan metabolism                            | 5    | 261     | 7   | 623    | 0.114447 | 0.839277 | 0.714285714 |
| ko00640 | Propanoate metabolism                            | 7    | 261     | 11  | 623    | 0.122352 | 0.841169 | 0.636363636 |
| ko02026 | Biofilm formation - Escherichia coli             | 2    | 261     | 2   | 623    | 0.17512  | 0.853398 | 1           |
| ko00040 | Pentose and glucuronate interconversions         | 3    | 261     | 4   | 623    | 0.20097  | 0.853398 | 0.75        |
| ko00330 | Arginine and proline metabolism                  | 5    | 261     | 8   | 623    | 0.202907 | 0.853398 | 0.625       |
| ko04922 | Glucagon signaling pathway                       | 4    | 261     | 6   | 623    | 0.205316 | 0.853398 | 0.666666667 |
| ko03440 | Homologous recombination                         | 4    | 261     | 6   | 623    | 0.205316 | 0.853398 | 0.666666667 |
| ko00561 | Glycerolipid metabolism                          | 5    | 261     | 9   | 623    | 0.306182 | 0.853398 | 0.555555556 |
| ko00770 | Pantothenate and CoA biosynthesis                | 4    | 261     | 7   | 623    | 0.326475 | 0.853398 | 0.571428571 |
| ko02020 | Two-component system                             | 8    | 261     | 16  | 623    | 0.33778  | 0.853398 | 0.5         |
| ko00071 | Fatty acid degradation                           | 3    | 261     | 5   | 623    | 0.35019  | 0.853398 | 0.6         |
| ko00473 | D-Alanine metabolism                             | 3    | 261     | 5   | 623    | 0.35019  | 0.853398 | 0.6         |
| ko04213 | Longevity regulating pathway - multiple species  | 3    | 261     | 5   | 623    | 0.35019  | 0.853398 | 0.6         |
| ko05230 | Central carbon metabolism in cancer              | 3    | 261     | 5   | 623    | 0.35019  | 0.853398 | 0.6         |

|         |                                                                   |    |     |    |     |          |          |             |
|---------|-------------------------------------------------------------------|----|-----|----|-----|----------|----------|-------------|
| ko04146 | Peroxisome                                                        | 3  | 261 | 5  | 623 | 0.35019  | 0.853398 | 0.6         |
| ko00300 | Lysine biosynthesis                                               | 3  | 261 | 5  | 623 | 0.35019  | 0.853398 | 0.6         |
| ko00620 | Pyruvate metabolism                                               | 11 | 261 | 23 | 623 | 0.351769 | 0.853398 | 0.47826087  |
| ko00480 | Glutathione metabolism                                            | 2  | 261 | 3  | 623 | 0.379285 | 0.853398 | 0.666666667 |
| ko00981 | Insect hormone biosynthesis                                       | 2  | 261 | 3  | 623 | 0.379285 | 0.853398 | 0.666666667 |
| ko00410 | beta-Alanine metabolism                                           | 2  | 261 | 3  | 623 | 0.379285 | 0.853398 | 0.666666667 |
| ko05111 | Biofilm formation - <i>Vibrio cholerae</i>                        | 2  | 261 | 3  | 623 | 0.379285 | 0.853398 | 0.666666667 |
| ko00053 | Ascorbate and aldarate metabolism                                 | 2  | 261 | 3  | 623 | 0.379285 | 0.853398 | 0.666666667 |
| ko00903 | Limonene and pinene degradation                                   | 2  | 261 | 3  | 623 | 0.379285 | 0.853398 | 0.666666667 |
| ko04016 | MAPK signaling pathway - plant                                    | 2  | 261 | 3  | 623 | 0.379285 | 0.853398 | 0.666666667 |
| ko05418 | Fluid shear stress and atherosclerosis                            | 2  | 261 | 3  | 623 | 0.379285 | 0.853398 | 0.666666667 |
| ko00072 | Synthesis and degradation of ketone bodies                        | 1  | 261 | 1  | 623 | 0.418941 | 0.853398 | 1           |
| ko04934 | Cushing syndrome                                                  | 1  | 261 | 1  | 623 | 0.418941 | 0.853398 | 1           |
| ko00966 | Glucosinolate biosynthesis                                        | 1  | 261 | 1  | 623 | 0.418941 | 0.853398 | 1           |
| ko00590 | Arachidonic acid metabolism                                       | 1  | 261 | 1  | 623 | 0.418941 | 0.853398 | 1           |
| ko04621 | NOD-like receptor signaling pathway                               | 1  | 261 | 1  | 623 | 0.418941 | 0.853398 | 1           |
| ko04931 | Insulin resistance                                                | 1  | 261 | 1  | 623 | 0.418941 | 0.853398 | 1           |
| ko04152 | AMPK signaling pathway                                            | 1  | 261 | 1  | 623 | 0.418941 | 0.853398 | 1           |
| ko03320 | PPAR signaling pathway                                            | 1  | 261 | 1  | 623 | 0.418941 | 0.853398 | 1           |
| ko00472 | D-Arginine and D-ornithine metabolism                             | 1  | 261 | 1  | 623 | 0.418941 | 0.853398 | 1           |
| ko05200 | Pathways in cancer                                                | 1  | 261 | 1  | 623 | 0.418941 | 0.853398 | 1           |
| ko05120 | Epithelial cell signaling in <i>Helicobacter pylori</i> infection | 1  | 261 | 1  | 623 | 0.418941 | 0.853398 | 1           |
| ko04918 | Thyroid hormone synthesis                                         | 1  | 261 | 1  | 623 | 0.418941 | 0.853398 | 1           |
| ko05211 | Renal cell carcinoma                                              | 1  | 261 | 1  | 623 | 0.418941 | 0.853398 | 1           |
| ko04626 | Plant-pathogen interaction                                        | 1  | 261 | 1  | 623 | 0.418941 | 0.853398 | 1           |
| ko04214 | Apoptosis - fly                                                   | 1  | 261 | 1  | 623 | 0.418941 | 0.853398 | 1           |
| ko04211 | Longevity regulating pathway                                      | 2  | 261 | 4  | 623 | 0.557601 | 0.927389 | 0.5         |
| ko00450 | Selenocompound metabolism                                         | 2  | 261 | 4  | 623 | 0.557601 | 0.927389 | 0.5         |
| ko00625 | Chloroalkane and chloroalkene degradation                         | 2  | 261 | 4  | 623 | 0.557601 | 0.927389 | 0.5         |
| ko04068 | FoxO signaling pathway                                            | 2  | 261 | 4  | 623 | 0.557601 | 0.927389 | 0.5         |

|         |                                             |    |     |    |     |          |          |             |
|---------|---------------------------------------------|----|-----|----|-----|----------|----------|-------------|
| ko00860 | Porphyrin and chlorophyll metabolism        | 4  | 261 | 9  | 623 | 0.565133 | 0.927389 | 0.444444444 |
| ko00250 | Alanine, aspartate and glutamate metabolism | 6  | 261 | 14 | 623 | 0.573296 | 0.927389 | 0.428571429 |
| ko00190 | Oxidative phosphorylation                   | 6  | 261 | 14 | 623 | 0.573296 | 0.927389 | 0.428571429 |
| ko00220 | Arginine biosynthesis                       | 6  | 261 | 14 | 623 | 0.573296 | 0.927389 | 0.428571429 |
| ko02024 | Quorum sensing                              | 3  | 261 | 7  | 623 | 0.621507 | 0.927389 | 0.428571429 |
| ko04112 | Cell cycle - Caulobacter                    | 3  | 261 | 7  | 623 | 0.621507 | 0.927389 | 0.428571429 |
| ko00790 | Folate biosynthesis                         | 3  | 261 | 7  | 623 | 0.621507 | 0.927389 | 0.428571429 |
| ko04212 | Longevity regulating pathway - worm         | 3  | 261 | 7  | 623 | 0.621507 | 0.927389 | 0.428571429 |
| ko05014 | Amyotrophic lateral sclerosis (ALS)         | 1  | 261 | 2  | 623 | 0.662761 | 0.927389 | 0.5         |
| ko04011 | MAPK signaling pathway - yeast              | 1  | 261 | 2  | 623 | 0.662761 | 0.927389 | 0.5         |
| ko05010 | Alzheimer disease                           | 1  | 261 | 2  | 623 | 0.662761 | 0.927389 | 0.5         |
| ko00360 | Phenylalanine metabolism                    | 1  | 261 | 2  | 623 | 0.662761 | 0.927389 | 0.5         |
| ko00362 | Benzoate degradation                        | 1  | 261 | 2  | 623 | 0.662761 | 0.927389 | 0.5         |
| ko04013 | MAPK signaling pathway - fly                | 1  | 261 | 2  | 623 | 0.662761 | 0.927389 | 0.5         |
| ko00760 | Nicotinate and nicotinamide metabolism      | 1  | 261 | 2  | 623 | 0.662761 | 0.927389 | 0.5         |
| ko00261 | Monobactam biosynthesis                     | 1  | 261 | 2  | 623 | 0.662761 | 0.927389 | 0.5         |
| ko05016 | Huntington disease                          | 1  | 261 | 2  | 623 | 0.662761 | 0.927389 | 0.5         |
| ko00791 | Atrazine degradation                        | 1  | 261 | 2  | 623 | 0.662761 | 0.927389 | 0.5         |
| ko00900 | Terpenoid backbone biosynthesis             | 1  | 261 | 2  | 623 | 0.662761 | 0.927389 | 0.5         |
| ko00010 | Glycolysis / Gluconeogenesis                | 11 | 261 | 28 | 623 | 0.682084 | 0.927389 | 0.392857143 |
| ko04066 | HIF-1 signaling pathway                     | 2  | 261 | 5  | 623 | 0.695875 | 0.927389 | 0.4         |
| ko00910 | Nitrogen metabolism                         | 2  | 261 | 5  | 623 | 0.695875 | 0.927389 | 0.4         |
| ko00430 | Taurine and hypotaurine metabolism          | 2  | 261 | 5  | 623 | 0.695875 | 0.927389 | 0.4         |
| ko03020 | RNA polymerase                              | 2  | 261 | 5  | 623 | 0.695875 | 0.927389 | 0.4         |
| ko00680 | Methane metabolism                          | 5  | 261 | 13 | 623 | 0.699757 | 0.927389 | 0.384615385 |
| ko00670 | One carbon pool by folate                   | 3  | 261 | 8  | 623 | 0.724384 | 0.937439 | 0.375       |
| ko00195 | Photosynthesis                              | 3  | 261 | 8  | 623 | 0.724384 | 0.937439 | 0.375       |
| ko03030 | DNA replication                             | 2  | 261 | 6  | 623 | 0.79628  | 0.951558 | 0.333333333 |
| ko03430 | Mismatch repair                             | 3  | 261 | 9  | 623 | 0.80401  | 0.951558 | 0.333333333 |
| ko00750 | Vitamin B6 metabolism                       | 1  | 261 | 3  | 623 | 0.804499 | 0.951558 | 0.333333333 |

|         |                                                     |   |     |    |     |          |          |             |
|---------|-----------------------------------------------------|---|-----|----|-----|----------|----------|-------------|
| ko03060 | Protein export                                      | 1 | 261 | 3  | 623 | 0.804499 | 0.951558 | 0.333333333 |
| ko00785 | Lipoic acid metabolism                              | 1 | 261 | 3  | 623 | 0.804499 | 0.951558 | 0.333333333 |
| ko00333 | Prodigiosin biosynthesis                            | 1 | 261 | 3  | 623 | 0.804499 | 0.951558 | 0.333333333 |
| ko00471 | D-Glutamine and D-glutamate metabolism              | 1 | 261 | 3  | 623 | 0.804499 | 0.951558 | 0.333333333 |
| ko00400 | Phenylalanine, tyrosine and tryptophan biosynthesis | 1 | 261 | 3  | 623 | 0.804499 | 0.951558 | 0.333333333 |
| ko00550 | Peptidoglycan biosynthesis                          | 4 | 261 | 12 | 623 | 0.815203 | 0.953961 | 0.333333333 |
| ko00051 | Fructose and mannose metabolism                     | 2 | 261 | 7  | 623 | 0.866189 | 0.99123  | 0.285714286 |
| ko00520 | Amino sugar and nucleotide sugar metabolism         | 5 | 261 | 16 | 623 | 0.872036 | 0.99123  | 0.3125      |
| ko00052 | Galactose metabolism                                | 1 | 261 | 4  | 623 | 0.886799 | 0.99123  | 0.25        |
| ko00780 | Biotin metabolism                                   | 1 | 261 | 4  | 623 | 0.886799 | 0.99123  | 0.25        |
| ko00240 | Pyrimidine metabolism                               | 8 | 261 | 25 | 623 | 0.892107 | 0.99123  | 0.32        |
| ko00983 | Drug metabolism - other enzymes                     | 1 | 261 | 5  | 623 | 0.93453  | 0.999299 | 0.2         |
| ko00500 | Starch and sucrose metabolism                       | 1 | 261 | 5  | 623 | 0.93453  | 0.999299 | 0.2         |
| ko03018 | RNA degradation                                     | 2 | 261 | 9  | 623 | 0.944728 | 0.999299 | 0.222222222 |
| ko00061 | Fatty acid biosynthesis                             | 2 | 261 | 9  | 623 | 0.944728 | 0.999299 | 0.222222222 |
| ko03420 | Nucleotide excision repair                          | 1 | 261 | 6  | 623 | 0.96218  | 0.999299 | 0.166666667 |
| ko02060 | Phosphotransferase system (PTS)                     | 1 | 261 | 6  | 623 | 0.96218  | 0.999299 | 0.166666667 |
| ko00710 | Carbon fixation in photosynthetic organisms         | 2 | 261 | 10 | 623 | 0.965068 | 0.999299 | 0.2         |
| ko00030 | Pentose phosphate pathway                           | 3 | 261 | 14 | 623 | 0.972139 | 0.999299 | 0.214285714 |
| ko00230 | Purine metabolism                                   | 8 | 261 | 31 | 623 | 0.982092 | 0.999299 | 0.258064516 |
| ko00564 | Glycerophospholipid metabolism                      | 1 | 261 | 9  | 623 | 0.992761 | 0.999299 | 0.111111111 |
| ko00970 | Aminoacyl-tRNA biosynthesis                         | 4 | 261 | 26 | 623 | 0.999299 | 0.999299 | 0.153846154 |

---
