# Supplementary material for: Molecular Details of Actinomycin D-Treated MRSA Revealed via High-Dimensional Data
Source: MDPI journal article supplement (doi:10.3390/md20020114), 2022-01-31
Supplement: s1 [file s1]

**Table S4.** Differential metabolites of leaves between the budding stage and mid-flowering stage.

| Ionization mode | Metabolite no. | Adduct                     | RT(s)    | m/z       | Metabolite                              | VIP         | Fold-change | P-value     |
|-----------------|----------------|----------------------------|----------|-----------|-----------------------------------------|-------------|-------------|-------------|
| ESI(+)          | 1              | (M+H)+                     | 827.766  | 231.09688 | Pro-Asp                                 | 1.716521002 | 0.031725183 | 2.56669E-06 |
| ESI(+)          | 2              | (M+H)+                     | 795.713  | 786.17382 | Flavin adenine dinucleotide (FAD)       | 1.716756556 | 0.039892782 | 6.0925E-06  |
| ESI(+)          | 3              | (M+H-2H <sub>2</sub> O)+   | 759.971  | 242.11265 | Arg-Cys                                 | 1.825266514 | 0.040696834 | 1.11933E-06 |
| ESI(+)          | 4              | (M+H-2H <sub>2</sub> O)+   | 780.429  | 270.14412 | Arg-Met                                 | 2.280503892 | 0.044029022 | 4.15581E-07 |
| ESI(+)          | 5              | (M+CH <sub>3</sub> CN+H)+  | 781.466  | 326.14514 | His-Glu                                 | 1.009719626 | 0.053455303 | 1.48423E-07 |
| ESI(+)          | 6              | (M+CH <sub>3</sub> CN+Na)+ | 684.808  | 457.21063 | (-)-Tylocrebrine                        | 1.322731506 | 0.055354548 | 5.13557E-05 |
| ESI(+)          | 7              | (M+H)+                     | 970.74   | 272.171   | Pro-Arg                                 | 2.922418314 | 0.056835838 | 2.32903E-09 |
| ESI(+)          | 8              | (M+H)+                     | 816.847  | 245.11275 | Pro-Glu                                 | 1.480345427 | 0.060185482 | 2.07523E-06 |
| ESI(+)          | 9              | (M+CH <sub>3</sub> CN+H)+  | 584.541  | 320.15999 | Pro-Tyr                                 | 2.4096227   | 0.085069586 | 3.93207E-05 |
| ESI(+)          | 10             | (M+H)+                     | 918.799  | 234.14427 | Lys-Ser                                 | 1.012932707 | 0.087696057 | 1.39632E-07 |
| ESI(+)          | 11             | (M+H)+                     | 1094.47  | 130.08521 | .beta.-Homoproline                      | 1.581729474 | 0.089548111 | 1.00767E-08 |
| ESI(+)          | 12             | (M+CH <sub>3</sub> CN+Na)+ | 843.688  | 213.12245 | Triethanolamine                         | 1.052678872 | 0.094879462 | 6.43086E-05 |
| ESI(+)          | 13             | (M+H)+                     | 1021.375 | 290.14516 | Asp-Arg                                 | 6.874206078 | 0.100501042 | 2.16355E-08 |
| ESI(+)          | 14             | (M+CH <sub>3</sub> CN+H)+  | 715.892  | 244.1286  | Pro-Ser                                 | 6.219000254 | 0.111135584 | 0.000161459 |
| ESI(+)          | 15             | (M+H)+                     | 543.105  | 220.11711 | Pantothenate                            | 1.916615826 | 0.119925617 | 4.11178E-07 |
| ESI(+)          | 16             | (M+H)+                     | 888.573  | 262.14984 | Ser-Arg                                 | 1.213775378 | 0.120424115 | 0.004048488 |
| ESI(+)          | 17             | (M+H-H <sub>2</sub> O)+    | 63.434   | 120.08003 | Tyramine                                | 1.133162373 | 0.1233688   | 1.68546E-06 |
| ESI(+)          | 18             | (M+H)+                     | 677.702  | 187.10701 | Pro-Ala                                 | 5.443999023 | 0.128610851 | 3.65765E-09 |
| ESI(+)          | 19             | (M+H)+                     | 861.904  | 227.11321 | L-Carnosine                             | 1.378423734 | 0.131994722 | 3.06254E-09 |
| ESI(+)          | 20             | (M+H)+                     | 920.071  | 262.13912 | Lys-Asp                                 | 1.213480582 | 0.140717404 | 0.000673525 |
| ESI(+)          | 21             | (M+CH <sub>3</sub> CN+H)+  | 827.097  | 501.22918 | 5-Methyltetrahydrofolate (5-Methyl-THF) | 1.221575518 | 0.144459256 | 4.48089E-05 |
| ESI(+)          | 22             | (M+H)+                     | 739.98   | 132.06451 | Hydroxyproline                          | 1.254757734 | 0.146616972 | 0.000338875 |
| ESI(+)          | 23             | (M+H)+                     | 835.875  | 191.06547 | Gly-Asp                                 | 1.099901936 | 0.169355452 | 5.796E-07   |
| ESI(+)          | 24             | (M+H)+                     | 735.947  | 244.12861 | Pro-Gln                                 | 2.253273911 | 0.175251268 | 1.86228E-06 |
| ESI(+)          | 25             | (M+H)+                     | 436.2485 | 124.0384  | Nicotinate                              | 1.407095398 | 0.178045788 | 5.46719E-06 |
| ESI(+)          | 26             | (M+H-H <sub>2</sub> O)+    | 177.248  | 115.08562 | Ornithine                               | 1.040781647 | 0.19115274  | 6.57653E-06 |
| ESI(+)          | 27             | (M+H)+                     | 664.234  | 217.11774 | Pro-Thr                                 | 2.160646225 | 0.193703018 | 6.15903E-08 |

|        |    |              |          |           |                                         |             |             |             |
|--------|----|--------------|----------|-----------|-----------------------------------------|-------------|-------------|-------------|
| ESI(+) | 28 | (M+H)+       | 701.644  | 173.09124 | Glycylproline                           | 1.937665338 | 0.204678211 | 1.39703E-06 |
| ESI(+) | 29 | (M+H)+       | 96.0085  | 123.05464 | Nicotinamide                            | 2.183507385 | 0.210714061 | 7.84717E-09 |
| ESI(+) | 30 | (M+H)+       | 874.791  | 664.11536 | Nicotinamide adenine dinucleotide (NAD) | 5.52930936  | 0.212634181 | 4.36973E-05 |
| ESI(+) | 31 | (M+H)+       | 697.352  | 288.20254 | Leu-Arg                                 | 1.826820361 | 0.22236366  | 3.17259E-06 |
| ESI(+) | 32 | (M+H)+       | 1088.33  | 203.14985 | NG,NG-dimethyl-L-arginine(ADMA)         | 1.112770305 | 0.238828054 | 0.002676914 |
| ESI(+) | 33 | (M+NH4)+     | 956.2135 | 247.13952 | Pro-Asn                                 | 1.652213604 | 0.240845596 | 0.00088118  |
| ESI(+) | 34 | (M+H)+       | 248.239  | 150.07676 | N6-Methyladenine                        | 1.656474172 | 0.264621556 | 1.92231E-06 |
| ESI(+) | 35 | (M+H-2H2O)+  | 876.5    | 524.05723 | ADP-ribose                              | 1.18032651  | 0.304245841 | 0.003164266 |
| ESI(+) | 36 | (M+H)+       | 848.0895 | 348.06976 | Adenosine monophosphate (AMP)           | 2.897826277 | 0.335096644 | 0.000401712 |
| ESI(+) | 37 | (M+H)+       | 346.5665 | 136.06078 | Adenine                                 | 1.001988337 | 0.434830207 | 0.000508165 |
| ESI(+) | 38 | (M+H)+       | 634.6685 | 116.06983 | D-Proline                               | 1.989415056 | 0.538096152 | 1.9565E-06  |
| ESI(+) | 39 | (M+H)+       | 782.4635 | 148.05966 | L-Glutamate                             | 1.319732367 | 0.611924236 | 6.44035E-05 |
| ESI(+) | 40 | (M+H)+       | 90.45    | 104.06994 | 3-Aminobutanoic acid                    | 1.699589341 | 0.736383282 | 0.016621898 |
| ESI(+) | 41 | (M+H)+       | 567.34   | 132.10104 | L-Isoleucine                            | 2.634120975 | 1.388065517 | 0.030731169 |
| ESI(+) | 42 | (M+H-H2O)+   | 461.6915 | 195.08697 | Gly-His                                 | 1.61614558  | 1.418884468 | 0.016916984 |
| ESI(+) | 43 | (M+H-H2O)+   | 304.132  | 251.14986 | His-Ile                                 | 3.511497265 | 1.453859682 | 0.048946434 |
| ESI(+) | 44 | (M+H-H2O)+   | 290.91   | 235.1187  | His-Pro                                 | 8.623945777 | 1.476714247 | 0.007030112 |
| ESI(+) | 45 | (M+H)+       | 890.618  | 277.13899 | L-Saccharopine                          | 1.096060889 | 1.52784196  | 0.016460024 |
| ESI(+) | 46 | (M+H-H2O)+   | 421.4865 | 209.10287 | His-Ala                                 | 1.040000525 | 1.540863934 | 0.007718382 |
| ESI(+) | 47 | (M+H)+       | 824.709  | 205.08132 | Gly-Glu                                 | 1.291268819 | 1.598849074 | 0.003553831 |
| ESI(+) | 48 | (M+H-H2O)+   | 278.316  | 251.10236 | Tyr-Ser                                 | 1.324616397 | 1.719664833 | 0.029745081 |
| ESI(+) | 49 | (M+CH3CN+H)+ | 58.1055  | 354.33568 | Phytanic acid                           | 1.166813745 | 1.750769883 | 0.016627909 |
| ESI(+) | 50 | (M-2H+3Na)+  | 911.3045 | 364.06488 | 2'-O-methylguanosine                    | 1.843839476 | 1.777974041 | 0.035697605 |
| ESI(+) | 51 | (M+H)+       | 346.11   | 114.06537 | Creatinine                              | 2.553412712 | 1.812658317 | 0.027690856 |
| ESI(+) | 52 | (M+H-H2O)+   | 332.0935 | 237.13407 | His-Val                                 | 2.271120867 | 1.932644915 | 0.000698315 |
| ESI(+) | 53 | (2M+H)+      | 76.1265  | 509.45536 | cis-9-Palmitoleic acid                  | 5.321507935 | 1.951589206 | 0.00214067  |
| ESI(+) | 54 | (M+H)+       | 627.355  | 130.08523 | D-Pipecolinic acid                      | 1.061266795 | 1.983015875 | 0.000350709 |
| ESI(+) | 55 | (M+H)+       | 518.466  | 215.13826 | Pro-Val                                 | 1.073585399 | 2.178968468 | 0.012724043 |
| ESI(+) | 56 | (M+H)+       | 652.9445 | 118.08538 | Betaine                                 | 1.559896661 | 2.240896077 | 0.011497012 |
| ESI(+) | 57 | (M+H-H2O)+   | 310.493  | 285.13421 | His-Phe                                 | 2.059367834 | 2.318092168 | 0.00797533  |

|        |    |                         |          |           |                                    |             |             |             |
|--------|----|-------------------------|----------|-----------|------------------------------------|-------------|-------------|-------------|
| ESI(+) | 58 | (M+H)+                  | 289.013  | 252.10832 | Deoxyadenosine                     | 1.03456887  | 2.617156147 | 0.016033706 |
| ESI(+) | 59 | (M+H-H <sub>2</sub> O)+ | 640.421  | 158.09174 | L-Citrulline                       | 1.27889112  | 2.775298448 | 0.00129445  |
| ESI(+) | 60 | (M+H)+                  | 1071.68  | 399.1438  | S-Adenosylmethionine               | 1.552351422 | 3.395707889 | 0.043618833 |
| ESI(+) | 61 | (M+H)+                  | 619.8235 | 189.08608 | N-Acetylglutamine                  | 1.416042266 | 3.551181528 | 0.000111985 |
| ESI(+) | 62 | M+                      | 831.9315 | 265.11092 | Thiamine                           | 4.175995731 | 5.09237414  | 0.000176487 |
| ESI(+) | 63 | (M+H)+                  | 736.727  | 175.10732 | N <sup>2</sup> -Acetyl-L-ornithine | 1.001008383 | 5.145493307 | 0.00295759  |
| ESI(+) | 64 | (M+H)+                  | 593.806  | 130.04868 | L-Pyroglutamic acid                | 2.045909049 | 5.506508991 | 3.96309E-05 |
| ESI(+) | 65 | (M+H)+                  | 326.421  | 245.07647 | Uridine                            | 1.251544246 | 5.798356844 | 0.005808544 |
| ESI(+) | 66 | (M+H)+                  | 966.146  | 405.00866 | Uridine 5'-diphosphate (UDP)       | 1.039013867 | 6.196180117 | 0.014497894 |
| ESI(+) | 67 | (M+H)+                  | 327.109  | 113.03372 | Uracil                             | 1.947268954 | 6.47768979  | 0.004836631 |
| ESI(+) | 68 | (M+H)+                  | 119.883  | 170.08066 | Pyridoxine                         | 1.065747255 | 6.492769309 | 0.001894997 |
| ESI(+) | 69 | (M+H)+                  | 737.673  | 120.06449 | L-Threonine                        | 1.465749975 | 7.355947197 | 0.000679389 |
| ESI(+) | 70 | (M+H)+                  | 592.8085 | 138.05417 | Anthranilic acid (Vitamin L1)      | 1.393688476 | 7.97108792  | 3.70833E-05 |
| ESI(+) | 71 | (M+H)+                  | 263.7905 | 282.1193  | N <sup>6</sup> -methyladenosine    | 2.581359024 | 8.188226956 | 0.000299134 |
| ESI(+) | 72 | (M+H)+                  | 1199.89  | 175.11836 | L-Arginine                         | 5.242125949 | 9.660411738 | 0.000310995 |
| ESI(+) | 73 | (M+H)+                  | 730.272  | 162.11154 | L-Carnitine                        | 4.209990771 | 13.10221699 | 0.000180515 |
| ESI(+) | 74 | (M+H)+                  | 761.554  | 217.12856 | N-.alpha.-Acetyl-L-arginine        | 2.425414253 | 13.94027006 | 3.07612E-08 |
| ESI(+) | 75 | (M+H)+                  | 684.808  | 145.13234 | N-Acetylcadaverine                 | 2.092242476 | 15.00018696 | 7.27832E-08 |
| ESI(+) | 76 | (M+H)+                  | 455.616  | 269.0877  | Inosine                            | 1.088935179 | 19.70852235 | 0.000510328 |
| ESI(-) | 77 | (M-H)-                  | 125.9235 | 271.22732 | 16-Hydroxypalmitic acid            | 3.123414324 | 0.030765043 | 3.67034E-06 |
| ESI(-) | 78 | (M-H)-                  | 617.9725 | 187.07188 | alpha-N-Acetyl-L-glutamine         | 2.909206328 | 0.046968508 | 1.51656E-06 |
| ESI(-) | 79 | (M-H)-                  | 460.718  | 601.35543 | Garcinol                           | 1.106452205 | 0.052572498 | 0.000268672 |
| ESI(-) | 80 | (M-H)-                  | 814.3735 | 243.02746 | L-Fucose-1-phosphate               | 1.442327486 | 0.054215425 | 9.19669E-06 |
| ESI(-) | 81 | (M-H)-                  | 330.6005 | 103.03949 | 2-hydroxy-butanoic acid            | 1.479435777 | 0.059338482 | 0.000224256 |
| ESI(-) | 82 | (2M-H)-                 | 59.742   | 375.27418 | 3-Hydroxycapric acid               | 1.623295922 | 0.078411678 | 1.44569E-06 |
| ESI(-) | 83 | (M-H)-                  | 682.8535 | 171.07715 | Glycylproline                      | 1.972096536 | 0.079981179 | 1.01502E-05 |
| ESI(-) | 84 | (M-H)-                  | 681.9105 | 130.05068 | Hydroxyproline                     | 1.951231219 | 0.087351294 | 0.007397003 |
| ESI(-) | 85 | (M-H)-                  | 68.468   | 325.31081 | Heneicosanoic acid                 | 2.169945221 | 0.094112554 | 1.14085E-10 |
| ESI(-) | 86 | (M-H)-                  | 852.785  | 363.03405 | Xanthylic acid (XMP)               | 1.043251821 | 0.110732215 | 5.02369E-05 |
| ESI(-) | 87 | (M-H)-                  | 487.9255 | 218.1033  | Pantothenate                       | 4.910225524 | 0.117448943 | 8.16272E-08 |

|        |     |                         |          |           |                                     |             |             |             |
|--------|-----|-------------------------|----------|-----------|-------------------------------------|-------------|-------------|-------------|
| ESI(-) | 88  | (M-H)-                  | 67.847   | 301.21671 | Eicosapentaenoic acid               | 1.74691917  | 0.12895033  | 0.005613187 |
| ESI(-) | 89  | (M-H)-                  | 67.865   | 337.31045 | Erucic acid                         | 2.179456536 | 0.147472342 | 2.17153E-07 |
| ESI(-) | 90  | (M-H)-                  | 575.169  | 114.05575 | D-Proline                           | 8.871497513 | 0.155911578 | 3.77689E-07 |
| ESI(-) | 91  | (M-H)-                  | 373.7495 | 158.08191 | Acetyl-DL-Valine                    | 1.027760718 | 0.156963074 | 3.09486E-06 |
| ESI(-) | 92  | (M-H)-                  | 70.206   | 297.27944 | Pristanic acid                      | 2.948246006 | 0.179431552 | 4.51139E-07 |
| ESI(-) | 93  | (M-H)-                  | 383.583  | 122.0243  | Nicotinate                          | 1.723660581 | 0.183931785 | 3.44154E-06 |
| ESI(-) | 94  | (M-H)-                  | 808.232  | 540.0525  | Cyclic adenosine diphosphate ribose | 4.495479518 | 0.227346157 | 1.86224E-05 |
| ESI(-) | 95  | (M-H)-                  | 785.1925 | 346.05517 | Adenosine monophosphate (AMP)       | 4.051010116 | 0.229792922 | 4.33533E-05 |
| ESI(-) | 96  | (M-H)-                  | 800.369  | 225.09898 | L-Carnosine                         | 1.149952203 | 0.261357449 | 7.46039E-08 |
| ESI(-) | 97  | (M-H)-                  | 89.081   | 269.24807 | Heptadecanoic acid                  | 1.094628206 | 0.285553966 | 7.50641E-06 |
| ESI(-) | 98  | (M-H)-                  | 690.313  | 117.01909 | Succinate                           | 5.395767605 | 0.300392593 | 1.88838E-08 |
| ESI(-) | 99  | (M-H)-                  | 690.324  | 73.0292   | Propionic acid                      | 1.686411249 | 0.31587453  | 3.84719E-08 |
| ESI(-) | 100 | (M-H)-                  | 185.4695 | 87.04497  | Isobutyric acid                     | 2.343837797 | 0.342768509 | 2.42408E-06 |
| ESI(-) | 101 | (M-H)-                  | 287.941  | 134.04681 | Adenine                             | 2.737928698 | 0.369057186 | 1.68915E-05 |
| ESI(-) | 102 | (M-H)-                  | 582.3905 | 159.07734 | D-Alanyl-D-alanine (D-Ala-D-Ala)    | 4.175401458 | 0.376679901 | 1.49669E-05 |
| ESI(-) | 103 | (M-H)-                  | 115.109  | 241.07275 | Lumichrome                          | 1.524338616 | 0.397148092 | 9.96745E-06 |
| ESI(-) | 104 | (M-H)-                  | 725.086  | 146.04586 | L-Glutamate                         | 9.777879175 | 0.424307657 | 1.60006E-06 |
| ESI(-) | 105 | (M-H)-                  | 69.0565  | 311.2948  | Arachidic acid                      | 1.16543757  | 0.426842976 | 6.1442E-07  |
| ESI(-) | 106 | (M-H)-                  | 524.554  | 148.04331 | L-Methionine                        | 1.519369162 | 0.441094438 | 0.000392926 |
| ESI(-) | 107 | (M-H)-                  | 73.6825  | 255.23256 | Palmitic acid                       | 2.397439412 | 0.610830828 | 4.51651E-06 |
| ESI(-) | 108 | (M-H)-                  | 71.336   | 283.26394 | Stearic acid                        | 3.313678384 | 0.862514813 | 0.047329527 |
| ESI(-) | 109 | (M-H <sub>2</sub> O-H)- | 739.8315 | 141.01681 | 2-Oxoadipic acid                    | 11.49174404 | 1.112807543 | 0.015515897 |
| ESI(-) | 110 | (M-H)-                  | 152.832  | 111.01986 | Uracil                              | 10.51210199 | 1.226014774 | 0.00067318  |
| ESI(-) | 111 | (M-H)-                  | 75.996   | 227.20136 | Myristic acid                       | 2.803482855 | 1.276702086 | 0.014404169 |
| ESI(-) | 112 | (M-H)-                  | 504.632  | 130.08721 | L-Leucine                           | 6.895815098 | 1.398479662 | 0.000752565 |
| ESI(-) | 113 | (M-H <sub>2</sub> O-H)- | 493.522  | 139.02572 | Allantoin                           | 1.441240374 | 1.429235003 | 0.043449459 |
| ESI(-) | 114 | (M-H)-                  | 69.026   | 303.23246 | Arachidonic Acid (peroxide free)    | 1.584200502 | 1.552145445 | 0.031914029 |
| ESI(-) | 115 | (M-H)-                  | 848.6815 | 362.04999 | Guanosine 5'-monophosphate (GMP)    | 1.848374725 | 1.660465656 | 0.020949487 |
| ESI(-) | 116 | (M-H)-                  | 555.074  | 116.07139 | L-Valine                            | 4.196935031 | 1.789289279 | 0.008828941 |
| ESI(-) | 117 | (M-H)-                  | 789.191  | 171.00631 | Glycerol 3-phosphate                | 1.952111201 | 1.840893433 | 0.001039034 |

|        |     |             |          |           |                                            |                 |             |             |
|--------|-----|-------------|----------|-----------|--------------------------------------------|-----------------|-------------|-------------|
| ESI(-) | 118 | (M-H)-      | 455.134  | 130.05049 | N-Acetyl-L-alanine                         | 1.100378506     | 1.943116692 | 0.002826663 |
| ESI(-) | 119 | (M-H)-      | 77.1415  | 213.18577 | Tridecanoic acid (Tridecyclic acid)        | 1.801870073     | 2.176208104 | 3.45535E-06 |
| ESI(-) | 120 | (M-H)-      | 71.9395  | 279.23241 | Linoleic acid                              | 2.413834103     | 2.418586118 | 4.239E-05   |
| ESI(-) | 121 | (M-H)-      | 676.278  | 173.093   | N2-Acetyl-L-ornithine                      | 1.582431484     | 2.645710147 | 0.004892409 |
| ESI(-) | 122 | (M-H)-      | 535.628  | 128.03524 | L-Pyroglutamic acid                        | 6.29720086      | 2.713615472 | 0.000350794 |
| ESI(-) | 123 | (M-H)-      | 783.4335 | 173.00883 | cis-Aconitate                              | 1.048118796     | 2.776346524 | 2.4079E-06  |
| ESI(-) | 124 | (M-H)-      | 73.1145  | 277.21673 | all cis-(6,9,12)-Linolenic acid            | 1.14535822      | 2.872880202 | 0.000854398 |
| ESI(-) | 125 | (M-H)-      | 659.711  | 118.05048 | L-Threonine                                | 3.488117562     | 3.071740942 | 1.342E-05   |
| ESI(-) | 126 | (M-H)-      | 873.988  | 191.01935 | Citrate                                    | 4.570144981     | 3.751829848 | 0.000261101 |
| ESI(-) | 127 | (M-H)-      | 784.0595 | 678.09484 | UDP-N-acetylmuraminate                     | 1.486460615     | 3.756361339 | 4.88909E-06 |
| ESI(-) | 128 | (M-H)-      | 709.672  | 104.03481 | L-Serine                                   | 1.259364456     | 4.117379151 | 2.1847E-07  |
| ESI(-) | 129 | (M+CH3COO)- | 940.39   | 368.9986  | D-Ribulose 1,5-bisphosphate                | 1.215117147     | 4.84016868  | 6.17194E-05 |
| ESI(-) | 130 | (M-H)-      | 554.7165 | 105.01882 | Glyceric acid                              | 1.400768531     | 5.135071914 | 0.000346204 |
| ESI(-) | 131 | (M-H)-      | 676.452  | 245.11398 | gamma-L-Glutamyl-L-valine                  | 1.451866518     | 5.672909573 | 2.72153E-06 |
| ESI(-) | 132 | (M-H)-      | 475.32   | 283.0687  | Xanthosine                                 | 1.754776292     | 6.838975681 | 0.004185335 |
| ESI(-) | 133 | M-          | 836.887  | 261.03789 | O-Phosphotyrosine                          | 3.04304649      | 7.096500564 | 6.57612E-06 |
| ESI(-) | 134 | (M-H)-      | 291.8    | 243.06179 | Uridine                                    | 2.231817557     | 7.6442517   | 0.002585684 |
| ESI(-) | 135 | (M-H)-      | 791.08   | 565.04627 | Uridine diphosphate glucose(UDP-D-Glucose) | 1.244101384     | 8.065073667 | 3.39963E-06 |
| ESI(-) | 136 | (M-H)-      | 201.709  | 131.07111 | Hydroxyisocaproic acid                     | 8.559323435     | 8.201841199 | 2.67769E-05 |
| ESI(-) | 137 | (M-H)-      | 906.724  | 402.99366 | Uridine 5'-diphosphate (UDP)               | 2.032542646     | 8.728524688 | 0.001513626 |
| ESI(-) | 138 | (M-H)-      | 537.799  | 116.03484 | Acetylglycine                              | 1.390001614     | 9.38506194  | 2.6507E-06  |
| ESI(-) | 139 | (M-H)-      | 48.8015  | 319.23036 | 20-HETE                                    | 3.32027569      | 10.63714649 | 1.69114E-07 |
| ESI(-) | 140 | (M-H)-      | 905.6735 | 184.9854  | DL-2-Phosphoglycerate                      | 1.70814079      | 11.248415   | 7.82654E-05 |
| ESI(-) | 141 | (2M-H)-     | 190.818  | 295.13935 | Mevalonic acid                             | 1.599473999     | 18.84960198 | 0.000523089 |
| ESI(-) | 142 | (M+CH3COO)- | 833.272  | 289.03265 | D-Ribose 5-phosphate                       | 1.931262155     | 19.64274604 | 3.66552E-05 |
| ESI(-) | 143 | (M-H)-      | 403.589  | 267.07291 | Inosine                                    | 2.994709886     | 24.4095334  | 0.000841881 |
| ESI(-) | 144 | (M-H)-      | 674.959  | 276.98815 | 2-C-Methyl-D-erythritol cyclodiphosphate   | 2,4-1.707182055 | 54.94563652 | 1.27879E-06 |
