# Supplementary material for: Molecular Details of Actinomycin D-Treated MRSA Revealed via High-Dimensional Data
Source: MDPI journal article supplement (doi:10.3390/md20020114), 2022-01-31
Supplement: s1 [file s1]

**Table S6.** Sequences of the used primers.

| Primer name | Sequence                |
|-------------|-------------------------|
| 16S rRNA-F  | GCTGCCCTTTGTATTGTC      |
| 16S rRNA-R  | AGATGTTGGGTTAAGTCCC     |
| GpmA-F      | CGTGCTTTAGATAACAACGC    |
| GpmA-R      | CATCATAAGAACGACGCC      |
| AcnA-F      | CATCAAGTGCCTATTCGT      |
| AcnA-R      | CAGCATCAAAGATAGGCAT     |
| Icd-F       | GCGACAAACATTCGATTCCC    |
| Icd-R       | CCACTGCTTAAATGAGCCTT    |
| ClfA-F      | GCAAAATCCAGCACAAACAGG   |
| ClfA-R      | TTCCTCCGCATTTGTATTGC    |
| Ebps-F      | GGTGCAGCTGGTGCAATGGGTGT |
| Ebps-R      | GCTGCGCCTCCAGCCAAACCT   |
