# Supplementary material for: Molecular Details of Actinomycin D-Treated MRSA Revealed via High-Dimensional Data
Source: MDPI journal article supplement (doi:10.3390/md20020114), 2022-01-31
Supplement: s1 [file s1]

**Table S7.** The information of the template for molecular docking.

| Protein | UniProt Accession | Template | Seq Identity<br>(%) | QMEANDisCo Global <sup>1</sup> | Resolution<br>(Å) |
|---------|-------------------|----------|---------------------|--------------------------------|-------------------|
| AcnA    | Q6G9K9            | 2b3y.1.A | 51.87               | 0.79 ± 0.05                    | 1.85              |
| Icd     | Q8NW61            | 1hqs.1.A | 78.62               | 0.83 ± 0.05                    | 1.55              |

<sup>1</sup> QMEANDisCo Global represent an overall model quality measurement with higher numbers indicating higher quality.
